1 Co-invasion of the ladybird *Harmonia axyridis* and its parasites *Hesperomyces virescens* fungus and  
2 *Parasitylenchus bifurcatus* nematode to the Caucasus

3

4 Marina J. Orlova-Bienkowskaja<sup>1\*</sup>, Sergei E. Spiridonov<sup>2</sup>, Natalia N. Butorina<sup>2</sup>, Andrzej O. Bienkowski<sup>2</sup>

5

6 <sup>1</sup> Vavilov Institute of General Genetics, Russian Academy of Sciences, Moscow, Russia

7 <sup>2</sup>A.N. Severtsov Institute of Ecology and Evolution, Russian Academy of Sciences, Moscow, Russia

8 \* Corresponding author (MOB)

9 E-mail: [marinaorlben@yandex.ru](mailto:marinaorlben@yandex.ru)

10

11 Short title: Co-invasion of *Harmonia axyridis* and its parasites to the Caucasus

12

### 13 **Abstract**

14 Study of parasites in recently established populations of invasive species can shed light on sources of  
15 invasion and possible indirect interactions of the alien species with native ones. We studied parasites of  
16 the global invader *Harmonia axyridis* (Coleoptera: Coccinellidae) in the Caucasus. In 2012 the first  
17 established population of *H. axyridis* was recorded in the Caucasus in Sochi (south of European Russia,  
18 Black sea coast). By 2018 the ladybird has spread to the vast territory: Armenia, Georgia and south  
19 Russia: Adygea, Krasnodar territory, Stavropol territory, Dagestan, Kabardino-Balkaria and North  
20 Ossetia. Examination of 213 adults collected in Sochi in 2018 have shown that 53% of them are infested  
21 with *Hesperomyces virescens* fungi (Ascomycota: Laboulbeniales) and 8% with *Parasitylenchus*  
22 *bifurcatus* nematodes (Nematoda: Tylenchida, Allantonematidae). Examined *H. axyridis* specimens were  
23 free of parasitic mite *Coccipolipus hippodamiae*. An analysis of the phylogenetic relationships of  
24 *Parasitylenchus bifurcatus* based on 18S rDNA confirmed the morphological identification of this  
25 species. *Hesperomyces virescens* and *Parasitylenchus bifurcatus* are firstly recorded from the Caucasus

26 and Russia, though widespread in Europe. It probably indicates that they appeared as a result of co-  
27 invasion with their host. *Harmonia axyridis* was released in the region for pest control, but laboratory  
28 cultures are always free of *H. virescens* and *P. bifurcatus*. Therefore, detection of *H. virescens* and *P.*  
29 *bifurcatus* indicates that population of *H. axyridis* in the Caucasus cannot derive exclusively from  
30 released specimens. We did not find *H. virescens* on 400 specimens of 31 other ladybird species collected  
31 in the same localities with *H. axyridis* in the Caucasus. No reliable correlation between infestation by *H.*  
32 *virescens* and *P. bifurcatus* has been found. Besides these two parasites an unidentified species of the  
33 order Mermithida is recorded. It is the first documented case of *H. axyridis* infestation by a parasitic  
34 nematode of this order in nature.

35 **Key words** *Harmonia axyridis*; harlequin ladybird; invader; parasites; *Hesperomyces virescens*;  
36 *Parasitylenchus bifurcatus*; alien species; biological invasions; co-invasion

## 37 Introduction

38 Despite a large body of work on invasion ecology, interactions of invasive species with their natural  
39 enemies, in particular parasites, are poorly studied [1]. Study of parasites of alien species in young,  
40 recently established populations is of great importance for understanding of routes of invasion [2]. Besides  
41 that, some parasites of alien species can affect native species [3]. Therefore, the study of parasites might  
42 reveal possible indirect interactions of an alien species with native ones and some reasons of its invasive  
43 success. The aim of our investigation was to determine what parasites affect the harlequin ladybird  
44 *Harmonia axyridis* (Pallas) (Coleoptera: Coccinellidae) in the Caucasus recently invaded by this species.

45 *Harmonia axyridis* native to East Asia has been introduced widely for biological control of  
46 agricultural pests and established almost all over the world (see detailed description of the native range  
47 [4] and overview of global invasion [5]). It established in Western Europe the late 1990s and then  
48 expanded its range rapidly. Outbreak of *H. axyridis* in some regions caused a number of negative  
49 ecological consequences including decline of native ladybird species [6]. Approximately by 2010 the  
50 expansion of European range to the east reached Russia and adjacent regions [7]. The reasons of the great  
51 invasive success of this species and decline of native ladybirds attract attention of hundreds of scientists  
52 (see review by Roy et al. [5]). Recent studies have shown that some symbionts of this global invader  
53 (parasites and microorganisms) have contributed to its success and sometimes even become a "biological  
54 weapon" against its competitors - native ladybirds [1, 3, 8].

55 *Harmonia axyridis* was widely used for biological control of Aphidae and other pests in the  
56 Caucasus since 1927. In particular, in the 1980s more than 107,000 of specimens brought from the Far  
57 East were released in Georgia [9]. But in spite of these massive releases, *H. axyridis* did not establish  
58 before the 21st century. The first established population in the region was recorded in Sochi in 2012 [10,  
59 11]. Then *H. axyridis* quickly spread and became common all over the Black Sea coast of the Caucasus  
60 and in adjacent regions. By 2018 it has been recorded in Armenia, Georgia including Abkhazia, and south

61 Russia: Adygea, Krasnodar territory, Stavropol territory, Rostov region, Dagestan, Kabardino-Balkaria  
62 and North Ossetia (Fig 1) [12–14]. The releases of *H. axyridis* continued at least to 2010 [15]. So it was  
63 unclear if the population in the Caucasus originated from released specimens or appeared a result of  
64 expansion of European invasive range of the species [11, 14, 16].

65

66 Fig 1. Known localities of *Harmonia axyridis* and its parasites in the Caucasus.

67 1 – localities of infestation of *Harmonia axyridis* with *Hesperomyces virescens* and *Parasitylenchus*  
68 *bifurcatus*, 2 – localities of infestation of *Harmonia axyridis* with *Hesperomyces virescens*, 3 – other  
69 localities of *Harmonia axyridis*. Regions of Russia: AD – Adygea, DA – Dagestan, KA – Kabardino  
70 Balkaria, KR – Krasnodar region, NO – North Ossetia, ST – Stavropol region. Localities of detection of  
71 the parasites: A – Golovinka, B – Razbityj Kotel, C – Central District, D – Agur, E – Adler, F – Veseloe.  
72 Description of localities and sources of information are indicated in supporting information (S1 Table).  
73 The map is compiled with the help of DIVA GIS program using the free basic map: [http://diva-](http://diva-gis.org/Data)  
74 [gis.org/Data](http://diva-gis.org/Data).

75 Establishment of *H. axyridis* in the Caucasus causes three main questions:

- 76 1. What are the sources of invasion of *H. axyridis* to the Caucasus?  
77 2. Why is *H. axyridis* currently established in the region, though previously failed to establish in  
78 spite of massive releases?  
79 3. How will *H. axyridis* affect native ladybird species?

80 Though our study of parasites cannot directly answer these difficult questions, it could probably shed  
81 some light on them.

82 We restrict usage of the term “parasites” to those organisms living at the expense of a single

83 host, which are multicellular (in contrast to pathogenic microorganisms) and do not directly cause death  
84 of the host (in contrast to parasitoids) [1]. Three species of parasites have been recorded to infest  
85 *Harmonia axyridis* in the world: *Hesperomyces virescens* Thaxt. fungi, *Coccipolipus hippodamiae*  
86 (McDaniel and Morrill) mites, and *Parasitylenchus bifurcatus* Poinar and Steenberg nematodes [1].

87 *Hesperomyces virescens* (Ascomycota: Laboulbeniales) is an obligate ectoparasite that has been  
88 reported to infect adults of over 30 ladybird species (Coleoptera: Coccinellidae) in all continents except  
89 Australia and Antarctica [1]. The association *H. axyridis*–*H. virescens* has been reported from Austria,  
90 Belgium, Czech Republic, Croatia, Germany, France, Hungary, the Netherlands, Poland, Slovakia, the  
91 UK, USA, Canada, Argentina, Ecuador, South Africa, and China [1]. *Hesperomyces virescens* has not  
92 been detected in Russia or in the Caucasus before [1]. Native range of this fungus is unknown. It was  
93 assumed that it could originate from North America [17]. Its entire life cycle takes place on integument of  
94 adult ladybird. The sticky spores have short life span, are exclusively spread by activities of the host,  
95 and transmission takes place during direct contact of specimens (mating or overwintering in  
96 aggregations) [18].

97 *Coccipolipus hippodamiae* (Acarina: Podapolipidae) is an ectoparasitic mite. All life stages live  
98 on the underside of the elytra of an adult ladybird and feed on the haemolymph. It is reported to affect  
99 five Coccinellidae species in North America, Africa and Europe. Transmission also takes place during  
100 mating or overwintering in aggregations.

101 *Parasitylenchus bifurcatus* (Nematoda: Allantonematidae) is an obligate endoparasite. Its only  
102 known host is *Harmonia axyridis*. Fertilized infective female enters an adult ladybird through spiracles or  
103 thin parts of the integument. It develops into a female of the first parasitic generation, producing eggs,  
104 from which the second parasitic generation females develop. The latter give birth to juvenile males and  
105 females, maturing and mating inside the body of the host. Then new infective females appear and leave  
106 the host. Mechanism of transmission is unknown [19]. *Parasitylenchus bifurcatus* originally described

107 from Denmark [19], has been also reported in the Netherlands [20], Czech Republic, Poland [1], the USA  
108 and Slovenia [21]. There have been no documented records of infestation of *H. axyridis* by nematodes  
109 belonging to the order Mermithida in nature.

110 No parasites of *H. axyridis* in the Caucasus and European Russia have been recorded [5]. We  
111 have found *Hesperomyces virescens*, *Parasitylenchus bifurcatus* and an unidentified species belonging to  
112 the order Mermithida on *H. axyridis* in the region.

## 113 **Materials and methods**

### 114 *Collection of Harmonia axyridis*

115 Adult *Harmonia axyridis* (213 specimens) were collected in the city of Sochi (south of European  
116 Russia, Krasnodar region, Black sea coast of the Caucasus) in April 17–May 15 2018. Localities of  
117 collection: Veseloe (43.41, 39.98), Central District (43.58, 39.73), Adler (43.42, 39.94), valley of Agur  
118 river (43.56, 39.83), Golovinka (43.79, 39.47), Razbityj Kotel (43.69, 39.73). The beetles were collected  
119 by shaking of different trees and shrubs branches and sweep-netting of grasses and collected by hand.  
120 Probably all these specimens have overwintered, since the larvae were firstly detected on May 1 and  
121 pupae on May 11. No specimens of young generation with soft elytra were detected. All beetles were  
122 placed in plastic containers and kept alive at a temperature of about +4°C.

### 123 *Screening for parasites*

124 In mid-June each specimen was examined under a stereomicroscope to detect if it was infested  
125 with parasites. First, the ladybird was examined externally from above and from below to determine the  
126 presence of ectoparasites. Then its elytra were removed to detect if tergites were infested with mites or  
127 other parasites. Then abdomen of each specimen was dissected to find endoparasites. This method allows  
128 to detect different parasites in one specimen. Dissection was performed in 0.9% NaCl solution. Collected  
129 nematodes were heat-killed (at 65°C) and fixed with TAF solution. Permanent slides of nematodes in  
130 anhydrous glycerin were prepared following the Seinhorst method [22]. Totally 60 permanent slides were

131 made. Permanent nematode slides and TAF-fixed nematodes are kept in the Helminthological Museum  
132 of the Russian Academy of Sciences (Moscow). Morphometric analysis encompassing measurements of  
133 common nematode body features was carried out on five fixed nematode specimens of each life stage,  
134 employing Zeiss Jenaval microscope. Photographs were taken employing Leica 5500B microscope.

### 135 *Identification*

136 Primarily the identification of the parasites was based on morphological features. Identification of  
137 *Parasitylenchus bifurcatus* was confirmed through nucleotide sequences analysis. The nematodes  
138 recovered from the ladybird haemocoel were frozen individually in sterile 0.7 ml Eppendorf tubes for  
139 DNA extraction, which was performed according to Holterman *et al.* [23]. The worm-lysis solution (950  
140  $\mu$ l of a mixture of 2 ml of 1M NaCl, 2 ml of 1M Tris-HCl, pH 8 plus 5.5 ml of deionised water plus 10  $\mu$ l  
141 of mercaptoethanol and 40  $\mu$ l of proteinase K, 20 mg ml<sup>-1</sup>) was prepared directly before DNA extraction.  
142 Aliquots of 25  $\mu$ l of sterile water and 25  $\mu$ l of worm-lysis solution were added to each tube with a  
143 nematode and incubated at 65°C for 90 min. The tubes containing the homogenate were then incubated at  
144 99°C for 5 min to deactivate proteinase K. About 1.0  $\mu$ l of homogenate was used as PCR template.

145 PCR reactions were performed using Encyclo Plus PCR kit (Evrogen®, Moscow, Russia)  
146 according to the manufacturer's protocol. Primer pairs Nem18S\_F (5'-CGC GAA TRG CTC ATT A CA  
147 ACA GC-3') and 26R (5'-CAT TCT TGG CAA ATG CTT TCG-3') were used to obtain partial (about  
148 900 bp long) sequence of 5' half of the mitochondrial 18S rDNA [24]. PCR cycling parameters included  
149 primary denaturation at 94°C for 5 min followed by 34 cycles 94°C for 45 s, 54°C for 60 s and 72°C for 1  
150 min, followed by post-amplification extension at 72°C for 3 min.

151 A pair of primers D2A (5'-ACA AGT ACC GTG AGG GAA AGT TG -3') and D3B (5'-TCG  
152 GAA GGA ACC AGC TAC TA-3') was used to amplify approx. 800 bp long sequence of D2D3  
153 expansion segment of 28S rDNA [25]. PCR cycling parameters included denaturation at 95°C for 3 min,  
154 followed by 35 cycles of 94°C for 30 s, 54°C for 35 s, and 72°C for 70 s and followed by post-  
155 amplification extension at 72°C for 5 min.

156 PCR products were visualised in 1% agarose gel. Then bands containing all obtained PCR product  
157 were excised from 0.8% agarose gel for DNA extraction with Wizard SV Gel and PCR Clean-Up System  
158 (Promega, Madison, USA). Samples were directly sequenced using the same primers as used for primary  
159 PCR. The sequences were combined and aligned using the Clustal\_X program after the addition of  
160 sequences from the GenBank [26]. Similar sequences were searched for in NCBI GenBank with BLAST  
161 algorithm [27]. Subsequently, the sequences were edited using the Genedoc 2.7 program [28], to prepare  
162 a file for the analysis in MEGA7.0.14 [29]. Phylogenetic trees were obtained with different methods (MP  
163 – maximum parsimony, NJ – neighbour joining and ML – maximum likelihood) and pairwise nucleotide  
164 differences were calculated. Obtained sequences were analysed in with three methods: maximum  
165 parsimony (MP), neighbor joining (NJ) and maximum likelihood (ML). Obtained sequences were  
166 deposited in GenBank MH718837 for the 18S rDNA sequence and MH722215 for the 28S rDNA.

#### 167 *Collection and external examination of other ladybird species*

168 Since *Hesperomyces virescens* fungi can develop not only on *H. axyridis*, but also on over 30 other  
169 ladybirds [1], we decided to examine other ladybirds collected by the same methods and in the same  
170 localities as *H. axyridis*. Four hundred specimens of ladybirds of 31 other species (both native and  
171 introduced) have been collected and screened for ectoparasitic fungi. The list of these ladybird species:  
172 *Adalia bipunctata* (Linnaeus), *Anisosticta novemdecimpunctata* (Linnaeus), *Calvia decemguttata*  
173 (Linnaeus), *Chilocorus bipustulatus* (Linnaeus), *Chilocorus renipustulatus* (Scriba), *Coccinella*  
174 *quinquepunctata* Linnaeus, *Coccinella septempunctata* Linnaeus, *Coccinula quatuordecimpustulata*  
175 (Linnaeus), *Cryptolaemus montrouzieri* Mulsant, *Exochomus quadripustulatus* (Linnaeus), *Halyzia*  
176 *sedecimguttata* (Linnaeus), *Harmonia quadripunctata* (Pontoppidan), *Hippodamia variegata* (Goeze),  
177 *Lindorus lophanthae* (Blaisdell), *Nephus bipunctatus* (Kugelann), *Parexochomus nigromaculatus*  
178 (Goeze), *Propylea quatuordecimpunctata* (Linnaeus), *Psyllobora vigintiduopunctata* (Linnaeus), *Rodolia*  
179 *cardinalis* (Mulsant), *Scymnus frontalis* (Fabricius), *Scymnus haemorrhoidalis* Herbst, *Scymnus*  
180 *interruptus* (Goeze), *Scymnus subvillosus* (Goeze), *Scymnus suturalis* Thunberg, *Serangium montazerii*



181 Fürsch, *Stethorus pusillus* (Herbst), *Subcoccinella vigintiquatuorpunctata* (Linnaeus), *Tytthaspis*  
182 *sedecimpunctata* (Linnaeus), *Vibidia duodecimguttata* (Poda).

## 183 **Results**

184 We have found three parasitic species on examined *H. axyridis* adults: *Hesperomyces virescens*  
185 (Ascomycota: Laboulbeniales, Laboulbeniaceae), *Parasitylenchus bifurcatus* (Nematoda: Tylenchida  
186 Allantonematidae) and unknown species belonging to Mermithida (Nematoda). All examined *H. axyridis*  
187 specimens were free of parasitic mite *Coccipolipus hippodamiae*.

### 188 *Hesperomyces virescens* Thaxt

189 Characteristic yellowish-greenish thalli of *Hesperomyces virescens* were detected on the host integument  
190 (Fig 2). Their morphology corresponds to the detailed description by De Kesel [30]. Identification was  
191 confirmed by mycologist E.Yu. Blagoveshchenskaya.

192

193 Fig 2. *Hesperomyces virescens* on *Harmonia axyridis*. (a) thalli (bar 50 µm), (b) ladybird covered with  
194 thalli (bar 3 mm).

195

196 Specimens of *H. axyridis* infested with *H. virescens* were found in all six localities, where the beetles  
197 were examined. The distance between the most western locality (Golovinka) and the most eastern  
198 (Veseloe) is more than 60 km. The thalli were found in 112 (53%) adults of *H. axyridis* (Table 1) and  
199 were situated on elytra, pronotum, sternites, legs and mouthparts of the beetles. It seems that *H.*  
200 *virescens* does not kill or significantly damage *H. axyridis*, since even the beetles covered with large  
201 number of fungi thalli moved actively. Males were infested more often than females (62% and 48%  
202 respectively). No signs of ectoparasitic fungi have been detected on 400 examined adults of other  
203 ladybird species.

204 Table 1. Infestation of *H. axyridis* with *Hesperomyces virescens* and *Parasitylenchus bifurcatus*.

|         | Number of specimens without parasites | Number of specimens infested with only <i>Hesperomyces virescens</i> | Number of specimens infested with only <i>Parasitylenchus bifurcatus</i> | Number of specimens infested with <i>P. bifurcatus</i> & <i>H. virescens</i> | Total |
|---------|---------------------------------------|----------------------------------------------------------------------|--------------------------------------------------------------------------|------------------------------------------------------------------------------|-------|
| Males   | 22                                    | 37                                                                   | 1                                                                        | 1                                                                            | 61    |
| Females | 69                                    | 67                                                                   | 9                                                                        | 7                                                                            | 152   |
| Total   | 91                                    | 104                                                                  | 10                                                                       | 8                                                                            | 213   |

205

206 *Parasitylenchus bifurcatus* Poinar, Steenberg

207 Parasitic nematodes of the family Allantonematidae were found in *H. axyridis* 18 specimens collected at  
 208 three out of six sampling locations (see Fig 1). Three different nematode life cycle stages, including a  
 209 subsequent generation parasitic female, vermiform (infective) female and male, were found in the  
 210 sampled beetles. The number of females of the subsequent generation varied from 5 to 32 per a beetle.  
 211 The number of vermiform nematode specimens varied considerably, sometimes being as high as about a  
 212 couple of hundred per a beetle.

213 Morphometric analysis of nematodes by standard body features allowed to identify the nematodes  
 214 extracted from ladybirds as *Parasitylenchus bifurcatus* Poinar, Steenberg, 2012 (Table 2). The  
 215 characteristic features of *P. bifurcatus* nematodes were as follows: a straight stylet lacking basal  
 216 thickenings, a forked tail tip in the vermiform females and juvenile males, spicules straight, wedge-  
 217 shaped or triangular, with narrow bursa and gubernaculum (Fig 3). We found that subsequent generation  
 218 of parasitic females also has forked tail tip.

219 Table 2. Morphometric characteristics of the nematode *P. bifurcatus* specimens, isolated from the  
 220 ladybird *Harmonia axyridis* collected in Sochi.

221

| Character                                      | Parasitic females of the subsequent generation (n= 5) | Vermiform (infective) females (n= 5) | Males (n= 5)        |
|------------------------------------------------|-------------------------------------------------------|--------------------------------------|---------------------|
| Body length, $\mu\text{m}$                     | 1118.0 (930.0–1660.0)                                 | 590.0 (530.0–670.0)                  | 403.0 (396.0–480.0) |
| Body width, $\mu\text{m}$                      | 124.0 (85.0–184.0)                                    | 12.6 (12.0–13.0)                     | 15.0(14.0–16.0)     |
| Stylet length, $\mu\text{m}$                   |                                                       | 11.5 (11.0–12.0)                     | 9.0 (8.0–11.0)      |
| Head to excretory pore distance, $\mu\text{m}$ | 155.4 (141.0–165.0)                                   | 50.6 (42.0–57.0)                     | 66.0(62.0–75.0)     |
| Vulva position, %                              | 89.4 (88.0–93.0)                                      | 88.0 (87.0–90.0)                     |                     |
| Tail length, $\mu\text{m}$                     | 39 (25.0–48.0)                                        | 33.2 (30.0–37.0)                     | 34.4(25.5–40.0)     |
| Spicule length, $\mu\text{m}$                  |                                                       |                                      | 12(11–13)           |

222

223

224

225 Fig 3. *Parasitylenchus bifurcatus*: (a) subsequent generation female of *P. bifurcatus* (bar 98  $\mu\text{m}$ ), (b)  
 226 subsequent generation female, tail (bar 28  $\mu\text{m}$ ), (c) vermiform (infective) female, (d) tail (bar 12  $\mu\text{m}$ ), (d)  
 227 male, tail (bar 12  $\mu\text{m}$ ).

228

229 Parasitic females of the subsequent generation, sampled in Sochi, were close in the size of their  
 230 body to the specimens of *P. bifurcates* from Denmark [19]. Their body length of the former was 1118.0  
 231  $\mu\text{m}$  (930.0–1660.0) and the body width was 124  $\mu\text{m}$  (85.0–184.0), compared with 1300  $\mu\text{m}$  (920–1600)

232 and 195  $\mu\text{m}$  (158–271) respectively in Danish specimens. In the population of *P. bifurcatus*, described in  
233 Slovenia [21], females of the subsequent generation were smaller: 886.4  $\mu\text{m}$  (782.0–1098.0) in length and  
234 72.3  $\mu\text{m}$  (59.0–81.0) in width, compared with females from the Sochi population.

235 The BLAST-search of similar nucleotide sequences in NCBI GenBank was performed for all  
236 three obtained sequences. These were the sequences of different clones and isolates of *Parasitylenchus*  
237 *bifurcatus*, which were found as the closest to the obtained 18S rDNA sequence of nematodes from  
238 *Harmonia axyridis* ladybirds from Russian Caucasus. All the similar sequences detected by BLAST-  
239 search were downloaded and used for comparison. Under all methods of analysis obtained sequence was  
240 a member of strongly supported clade (100% bootstrap support) consisting of *P. bifurcatus* sequences  
241 plus a sequence of unidentified Allantonematidae (Fig 4). Obtained sequence of *H. axyridis* parasite from  
242 Russian Caucasus was 100% identical to some published sequences of *P. bifurcatus* (e.g. clones ‘314j’,  
243 ‘3j4i’ and ‘PaTyBif1’). Remarkably, an unidentified allantonematid nematode, the sequence of which is  
244 deposited as JQ941710 was found to be identical to that obtained in the course of our study was found in  
245 2010 in Germany in the haemocoel of *H. axyridis* (E.L. Rhule, unpublished). It seems, that these  
246 nematodes from Germany also belong to the species *P. bifurcatus*. All other known 18 rDNA sequences  
247 of *P. bifurcatus* differ from our sequence in one or two nucleotides. Several clades demonstrated close,  
248 but not securely resolved relationships with the clade containing sequences of *P. bifurcatus*. Under all  
249 methods of analysis the 18S rDNA sequence of *Howardula phyllotretae* Oldham, 1933 is in sister  
250 relationships with *P. bifurcatus* clade (Fig 4). One such clade consists of the sequences of parasitic  
251 tylenchids of fleas: *Rubzovinema* Slobodyanyuk, 1991, *Spilotylenchus* Launay, Deunff & Bain, 1983 and  
252 *Psyllotylenchus* Poinar & Nelson, 1973 (Fig 4). Another related clade was represented by species of  
253 *Deladenus* Thorne, 1941 and unidentified Tylenchomorpha gen.sp. Other sequences of *Howardula* Cobb,  
254 1921 were most distant from *P. bifurcatus* (different in 59–60 bp) in our analysis and served as a root for  
255 obtained cladograms.

256 The known and deposited in NCBI GenBank 28S rDNA sequences of entomoparasitic tylenchids

257 are less numerous than 18S rDNA data. Obtained cladogram demonstrates close relationships of studied  
258 nematode with two other sequences obtained for unidentified species of *Parasitylenchus*: DQ328729 and  
259 KM245038 (Fig 5). Both are related to the parasites of bark beetles in Russia and Czech Republic,  
260 correspondingly. In the level of nucleotide differences these two *Parasitylenchus* sequences are the  
261 closest to nematodes from *H. axyridis* (87 and 90 bp), when the nucleotide differences with all other  
262 studied entomoparasitic tylenchids exceed 100 bp. The sequence of *Howardula phyllostretae* together  
263 with that of *Anguillonema amolensis* Mobasseri, Pedram et Pourjam, 2017 are forming a clade which is  
264 in sister position to *Parasitylenchus* Micoletzky, 1922 clade under all methods of analysis (Fig 5). As in  
265 18S rDNA cladogram the sequences of flea parasites (*Rubzovinema*, *Spylotylenchus*, *Psyllotylenchus*) are  
266 forming well supported clade (Fig 5). The relationships of this latter clade with *Parasitylenchus*  
267 (*Howardula phyllostretae* + *Anguillonema amolense*) clade are strongly supported.

268

269 Fig 4. The relationships of *Parasitylenchus bifurcatus* from Sochi, Russia with other groups of insect-  
270 associated tylenchids inferred from analysis of partial 18S rDNA. Bootstrap support is given near  
271 corresponding nodes in the format MP/NJ/ML.

272

273 Fig 5. The relationships of *Parasitylenchus bifurcatus* from Sochi, Russia with other groups of insect-  
274 associated tylenchids inferred from analysis of partial 28S rDNA. Bootstrap support is given near  
275 corresponding nodes in the format MP/NJ/ML.

276 *Parasitylenchus bifurcatus* was found in 8% of all dissected adults of *H. axyridis*. Prevalence in females  
277 and males was 10% and 3% respectively, but this difference is not reliable because of small number of  
278 infested specimens. The incidence of the ladybird infestation by *Parasitylenchus bifurcatus* in Sochi is  
279 lower, compared with the results of the former studies in the countries of Europe: the incidence of  
280 infested ladybirds was as high as up to 35% in Denmark [19], and even up to 47% in Czech Republic [1].  
281 *Parasitylenchus bifurcatus* was found also in specimens infested with *Hesperomyces virescens* and free

282 of fungi, and no correlation between infestation of specimens with *Parasitylenchus bifurcatus* and  
283 *Hesperomyces virescens* was observed (Fig 6).

284

285 Fig 6. Proportion of *Harmonia axyridis* adults infested with *Hesperomyces virescens* and *Parasitylenchus*  
286 *bifurcatus*. Number of examined specimens is indicated in brackets.

287

288 The only one specimen of a nematode, belonging to the order Mermithida, was found in the only ladybird  
289 specimen sampled in Veseloe. This was the first documented case of the ladybird *H. axyridis* infestation  
290 by a parasitic nematode of this order in nature. Formerly von Linstow [31] reported *Mermis nigrescens*  
291 Dujardin (Mermithida: Mermithidae) to be a parasite of the other ladybird species, *C. septempunctata*.  
292 The infestation of *Adonia variegata*, *C. septempunctata* und *Semiadalia undecimnotata* with unidentified  
293 mermithids in South-East of France was reported by G. Iperiti [32]. H. Kaiser and W.R. Nickle [33]  
294 described the *Coccinella septempunctata* infestation with *Hexamermis* sp. in Styria, Austria. An  
295 overview of reports of coccinellid infestation with mermithid nematodes was presented by G.O. Poinar Jr  
296 [34]. A study, specifically focused on the search of parasitic nematodes of this order in the Sochi area,  
297 their identification to the species, and determination of the incidence of ladybird infestation is planned for  
298 future.

299

## Discussion

300 Haelewaters et al. [1] supposed that infection of young populations of *H. axyridis* in some newly invaded  
301 regions by *H. virescens* and *P. bifurcatus* (North America, Netherlands), occurred as a result of  
302 acquisition of native natural enemies. In the Caucasus co-invasion hypothesis is more relevant than  
303 acquisition hypothesis. First, *H. virescens* and *P. bifurcatus* were absent in the region and appeared at the  
304 same time with their host. Locality of the current records of the parasites (Sochi) is situated at more than  
305 1400 km from the nearest known localities of both parasitic species. Second, other examined ladybird  
306 species are not infested with *H. virescens* in the Caucasus. Other ladybirds were not dissected to find

307 nematodes, but, since *H. axyridis* is the only known host of *P. bifurcatus*, there is no reason to suggest an  
308 *H. axyridis* got infected from other ladybird species. Third, an analysis of the phylogenetic relationships  
309 of *Parasitylenchus bifurcatus* based on 18S rDNA demonstrated complete identity of 18S rDNA  
310 sequence of these nematodes from Russian Caucasus with some strains or clones found in Western and  
311 Southern Europe. Cautiously, such identity can be considered as an indication on the possible transfer of  
312 parasites together with insect hosts from Western part of Eurasia.

313 Since *H. axyridis* was released for biological control of pests in the Caucasus, it was unclear, how  
314 the population of *H. axyridis* appeared: as a result of these releases or as a result of expansion of its  
315 European range [11, 16]. The study of parasites has shed light on this question. Both *H. virescens* and *P.*  
316 *bifurcatus* affect only adults, do not occur on other life stages and exclusively spread by activities of the  
317 host [18]. Transmission takes place only from adult to adult, therefore the direct contact between different  
318 generations of beetles is necessary for to maintain the life cycle of the parasites. Since different  
319 generations are kept separately in laboratory culture [35], it is free of parasites. Therefore, detection of *H.*  
320 *virescens* and *P. bifurcatus* indicates that population of *H. axyridis* in the Caucasus cannot derive  
321 exclusively from specimens released from laboratory culture. At least part of ancestors of the Caucasian  
322 population of *Harmonia axyridis* are from European invasive range. On the other hand, admixture of  
323 released specimens is not excluded, since *H. axyridis* was released in Sochi for several decades. The  
324 complex invasion scenaria are common place for alien insects in general [36] and for *Harmonia axyridis*  
325 in particular [37]. This case and some other recent studies [2] confirm that parasitological analysis is a  
326 promising approach of revealing of invasion routes.

327 Roy et al [17] supposed that connection of *H. virescens* with *H. axyridis* coupled with the rapid  
328 expansion of *H. axyridis* globally suggests that this parasite will continue to spread throughout the rest of  
329 the world. Spread of *H. virescens* to the Caucasus confirms this suggestion.

330 *Hesperomyces virescens* is found to be widespread and common on *H. axyridis* at the Black sea  
331 coast of the Caucasus. But in spite of high prevalence of *H. virescens* on *Harmonia axyridis* we have not  
332 found it on other potential hosts in the Caucasus. No signs of Laboulbeniales ectoparasites have been

333 detected on other ladybird species, in spite seven of them were indicated by Ceryngier and Twardowska  
334 [38] as hosts of *Hesperomyces virescens* in other regions: *Adalia bipunctata*, *Chilocorus bipustulatus*,  
335 *Chilocorus renipustulatus*, *Coccinula quatuordecimpustulata*, *Propylea quatuordecimpunctata*,  
336 *Psyllobora vigintiduopunctata* and *Tytthaspis sedecimpunctata*. The same situation was previously  
337 observed by A. De Kesel in Europe in spite some potential hosts overwintered at the same sited with  
338 *Harmonia axyridis* [1]. Also Cottrell and Riddick [18] found reduced interspecific transmission of *H.*  
339 *virescens* (under laboratory conditions) and hence suggested the existence of hostadapted isolates or  
340 strains of *H. virescens*.

341 *Hesperomyces virescens* does not seriously damage its hosts [17], but *Parasitylenchus bifurcatus*  
342 capable of causing significant harm [19]. Co-infection of *H. axyridis* with *H. virescens* and *P. bifurcatus*  
343 was recorded in Netherlands and positive association between these parasites was detected that correlated  
344 with a reduced number of live beetles [20]. No correlation between infestation by *H. virescens* and *P.*  
345 *bifurcatus* has been yet recorded in the Caucasus. But the number of collected specimens was small, so  
346 possibility of such correlation cannot be ruled out. The study of co-infection of *H. axyridis* by these two  
347 parasites is an intriguing subject for future studies, since co-infections might result in lower survival  
348 rates.

349 The obtained nucleotide sequences are significant as the confirmation of primary parasitic  
350 nematode identification based on morphological features. Several sequences for 18S rDNA of *P.*  
351 *bifurcatus* are deposited in NCBI GenBank, and newly obtained ones for the specimens from Sochi are  
352 identical with some of these. Unlike 18S rDNA data, those for large ribosomal subunit (28S rDNA) of  
353 *Parasitylenchus* nematodes are quite scarce and can only prove the sufficient informative value of this  
354 locus for phylogenetic studies of entomoparasitic tylenchids. These data securely demonstrated the  
355 clustering of *P. bifurcatus* sequence with two known sequences of *Parasitylenchus* nematodes. The  
356 results of both 18S and 28S analyses revealed some incongruence in contemporary taxonomy of these  
357 nematodes. Thus, it is obvious in the obtained phylogenetic trees that some genera are polyphyletic: we



358 can find the species of *Howardula* in three clades of 18S rDNA cladogram, *Deladenus* sequences in two  
359 clades of 18S and 28S rDNA cladograms.

## 360 **Conclusions**

- 361 1. The population of *H. axyridis* in the Caucasus recently invaded by this species is infested with  
362 two parasite species, which are recorded for the Caucasus and Russia for the first time:  
363 *Hesperomyces viorescens* and *Parasitylenchus bifurcatus*. Probably these parasites have  
364 appeared in the region as a result of co-invasion with *H. axyridis*.
- 365 2. Population of *H. axyridis* in the Caucasus appeared as a result of expansions of European range,  
366 as 18S rDNA sequences of Caucasian *Parasitylenchus bifurcatus* and those from Western Europe  
367 are 100% identical. It cannot derive exclusively from specimens released for biological control of  
368 pests, because laboratory cultures are free of these parasites.
- 369 3. Though *Hesperomyces viorescens* develops on many ladybird species in other regions, its only  
370 known host in the Caucasus is *Harmonia axyridis*.
- 371 4. An unidentified species of the order Mermithida is recorded on *Harmonia axyridis* in the  
372 Caucasus. It is the first documented case of the ladybird *H. axyridis* infestation by a parasitic  
373 nematode of this order in nature.

## 374 **Acknowledgements**

375 We are grateful to E.Yu. Blagoveshchenskaya (Department of Mycology and Algology of Moscow State  
376 University) for identification of the parasitic fungi and taking the photo of thalli, to P. Ceryngier (Faculty  
377 of Biology and Environmental Sciences, Cardinal Stefan Wyszyński University) for valuable  
378 information and to T.A. Mogilevich for the help in screening of the ladybirds for parasites.

379

## 380 **References**

- 381 1. Haelewaters D, Zhao SY, Clusella-Trullas S, Cottrell TE, De Kesel A, Fiedler L, et al. Parasites

- 382 of *Harmonia axyridis*: current research and perspectives. *Biocontrol* (Dordr). 2017;62: 355–371.  
383 doi: 10.1007/s10526-016-9766-8.
- 384 2. Reshetnikov AN, Sokolov SG, Protasova EN. Detection of a neglected introduction event of the  
385 invasive fish *Perccottus glenii* using parasitological analysis. *Hydrobiologia*. 2017;788(1): 65–73  
386 doi: 10.1007/s10750-016-2987-0.
- 387 3. Vilcinskis A, Stoecker K, Schmidtberg H, Röhrich CR, Vogel H. Invasive harlequin ladybird  
388 carries biological weapons against native competitors. *Science*. 2013;340(6134): 862–863. doi:  
389 10.1126/science.1234032.
- 390 4. Orlova-Bienkowskaja MJ, Ukrainsky AS, Brown PMJ. *Harmonia axyridis* (Coleoptera:  
391 Coccinellidae) in Asia: a re-examination of the native range and invasion to southeastern  
392 Kazakhstan and Kyrgyzstan. *Biol Invasions*. 2015;17(7): 1941–1948. doi: 10.1007/s10530-015-  
393 0848-9.
- 394 5. Roy HE, Brown PMJ, Adriaens T, Berkvens N, Borges I, Clusella-Trullas S, et al. The harlequin  
395 ladybird, *Harmonia axyridis*: global perspectives on invasion history and ecology. *Biol Invasions*.  
396 2016;18(4): 997–1044. doi: 10.1007/s10530-016-1077-6.
- 397 6. Roy HE, Adriaens T, Isaac NJ, Kenis M, Onkelinx T, Martin GS, et al. Invasive alien predator  
398 causes rapid declines of native European ladybirds. *Divers Distrib*. 2012;18(7): 717–725. doi:  
399 10.1111/j.1472-4642.2012.00883.x.
- 400 7. Ukrainsky AS, Orlova-Bienkowskaja MJ Expansion of *Harmonia axyridis* Pallas (Coleoptera:  
401 Coccinellidae) to European Russia and adjacent regions. *Biol Invasions*. 2014;16(5): 1003–1008  
402 doi: 10.1007/s10530-013-0571-3.
- 403 8. Goryacheva I, Blekhman A, Andrianov B, Romanov D, Zakharov I. *Spiroplasma* infection in  
404 *Harmonia axyridis*-Diversity and multiple infection. *PLoS One*. 2018;13(5): e0198190. doi:  
405 10.1371/journal.pone.0198190.
- 406 9. Kuznetsov VN. Far Eastern coccinellids in the Transcaucasia. *Zashchita rasteniy*. 1988;5: 19. [In  
407 Russian]

- 408 10. Mogilevich TA. My experiments with the ladybird *Harmonia axyridis* [cited 6 August 2018]. In:  
409 Beetles and coleopterologists 2012. Available from:  
410 <https://www.zin.ru/aNIMALiA/Coleoptera/rus/mogilev1.htm>. [in Russian]
- 411 11. Belyakova NA, Reznik SY. First record of the harlequin ladybird, *Harmonia axyridis*  
412 (Coleoptera: Coccinellidae) in the Caucasus. Eur J Entomol. 2013;110(4): 699–702.
- 413 12. Orlova-Bienkowskaja MJ, Mogilevich TA. The first record of Asian ladybird *Harmonia axyridis*  
414 (Pallas, 1773) (Coleoptera: Coccinellidae) in Kabardino- Balkaria and the history of the expansion  
415 of this alien species in the Caucasus and south of European Russia in 2002–2015. Caucasian  
416 Entomological Bulletin. 2016;12(1): 93–98. [In Russian]
- 417 13. Alekseev SK, Butaeva FG. Ladybirds (Coleoptera: Coccinellidae) of the vicinity of Alagir City  
418 (Republic of North Ossetia-Alania). In: Actual problems of chemistry, biology and biotechnology:  
419 Proceedings of the 10th All-Russian Scientific Conference (11–13 May 2016). North Ossetia  
420 State Univeristy. Vladikavkaz: Publishing house of North Ossetia State University; 2016. pp. 71–  
421 75. [in Russian]
- 422 14. Kalashian MY, Ghrejyan TL, Karagyan GH. Harlequin ladybird *Harmonia axyridis* Pall.  
423 (Coleoptera, Coccinellidae) in Armenia. Russ J Biol Invasions. 2017;8(4): 313–315. doi:  
424 10.1134/S207511171704004X.
- 425 15. Bugaeva LN, Ignat'eva TN, Novikov YuP., Kashutina EV. Problem of protection of vegetables at  
426 organic food agriculture. Newsletter of the East Palaearctic Regional Section of the  
427 International organizations for the biological control of harmful animals and plants, 2011;42: 32–  
428 35. [in Russian]
- 429 16. Orlova-Bienkowskaja MJ. The outbreak of harlequin ladybird *Harmonia axyridis* (Pallas, 1773)  
430 (Coleoptera, Coccinellidae) in the Caucasus and Possible Sources of Invasion. Russ J Biol  
431 Invasions. 2014;5(4): 275–281. doi: 10.1134/S2075111714040055.

- 432 17. Roy HE, Rhule E, Harding S, Handley LJJ, Poland RL, Riddick EW, Steenberg T. Living with  
433 the enemy: parasites and pathogens of the ladybird *Harmonia*  
434 *axyridis*. *Biocontrol* (Dordr). 2011;56(4): 663–679. doi: 10.1007/s10526-011-9387-1.
- 435 18. Cottrell TE, Riddick EW. Limited transmission of the ectoparasitic fungus *Hesperomyces*  
436 *virescens* between lady beetles. *Psyche*. 2012;814378. doi: 10.1155/2012/814378.
- 437 19. Poinar GO, Steenberg T. *Parasitylenchus bifurcatus* n. sp. (Tylenchida: Allantonematidae)  
438 parasitizing *Harmonia axyridis* (Coleoptera: Coccinellidae). *Parasit Vectors*. 2012;5(1): 218. doi:  
439 10.1186/1756-3305-5-218.
- 440 20. Raak-van den Berg CL, van Wielink PS, de Jong PW, Gort G, Haelewaters D, Helder J, Karszen  
441 G, van Lenteren JC. Invasive alien species under attack: natural enemies of *Harmonia axyridis* in  
442 the Netherlands. *Biocontrol* (Dordr). 2014;59: 229–240. doi: 10.1007/s10526-014-9561-3.
- 443 21. Gerič Stare B, Širca S, Urek G. First report of nematodes *Parasitylenchus bifurcatus* Poinar &  
444 Steenberg, 2012 parasitizing multicolored Asian lady beetle *Harmonia axyridis* (Pallas, 1773) in  
445 Slovenia. *Acta Agric Slov*. 2017;109(2): 457–463. doi: 10.14720/aas.2017.109.2.28.
- 446 22. Seinhorst JW. A rapid method for the transfer of nematodes from fixative to anhydrous glycerin.  
447 *Nematologica*. 1959;4(1): 67–69.
- 448 23. Holterman M, van der Wurff A, van den Elsen S, van Megen H, Bongers T, Holovachov O, et al.  
449 Phylum-wide analysis of SSU rDNA reveals deep phylogenetic relationships among nematodes  
450 and accelerated evolution towards crown clades. *Mol Biol Evol*. 2006;23: 1792–1800. doi:  
451 10.1093/molbev/msl044.
- 452 24. Floyd RM, Rogers AD, Lamshead PJD, Smith CR. Nematode-specific PCR primers for the 18S  
453 small subunit rRNA gene. *Mol Ecol Notes*. 2005;5: 611–612. doi: 10.1111/j.1471-  
454 8286.2005.01009.x.
- 455 25. Nadler SA, Bolotin E, Stock SP Phylogenetic relationships of *Steinernema* Travassos, 1927  
456 (Nematoda: Cephalobina: Steinernematidae) based on nuclear, mitochondrial and morphological  
457 data. *Systematic Parasitology*. 2006;63: 161–181.

- 458 26. Thompson JD, Gibson TJ, Plewniak F, Jeanmougin F, Higgins, DG. The Clustal\_X windows  
459 interface: flexible strategies for multiple sequence alignment aided by quality analysis tools.  
460 Nucleic Acids Res. 1997;24: 4876–4882. doi: 10.1093/nar/25.24.4876.
- 461 27. Altschul SF, Gish W, Miller W, Myers EW, Lipman DJ. Basic local alignment search tool. J Mol  
462 Biol. 1990;215: 403–410.
- 463 28. Nicholas KB, Nicholas HB Jr., Deerfield DW. Multiple Sequence Alignment Editor and Shading  
464 Utility, Version 2.7.000: 1997. [cited 6 August 2018] Available from:  
465 <http://www.psc.edu/biomed/genedoc>.
- 466 29. Kumar S, Stecher G, Tamura K. MEGA7: Molecular evolutionary genetics analysis. Version 7.0  
467 for bigger datasets. Mol Biol Evol. 2016;33: 1870–1874. doi: 10.1093/molbev/msw054.
- 468 30. De Kesel A. *Hesperomyces* (Laboulbeniales) and coccinellid hosts. Sterbeekia. 2011;30: 32–37.
- 469 31. Linstow OFP von. Das Genus *Mermis*. Archiv für mikroskopische Anatomie und  
470 Entwicklungsmechanik 1898;53: 149–168.
- 471 32. Ipert G. Les parasites des Coccinelles aphidiphages dans les Alpes-Maritimes et les Basses-  
472 Alpes. Entomophaga. 1964;9: 153–180.
- 473 33. Kaiser H, Nickle WR. Mermithiden (Mermithidae, Nematoda) parasitieren Marienkafer  
474 (*Coccinella septempunctata* L.) in der Steiermark. Mitteilungen Naturwissenschaftlicher Verein  
475 für Steiermark. 1985: 115–118.
- 476 34. Poinar GO Nematodes for biological control of insects. Boca Raton: CRC Press; 1979.
- 477 35. Izhevsky SS. Introduction and application of entomophages. Moscow: Agropromizdat; 1990. [In  
478 Russian]
- 479 36. Garnas JR, Auger-Rozenberg MA, Roques A, Bertelsmeier C, Wingfield MJ, Saccaggi DL, Roy  
480 HE, Slippers B. Complex patterns of global spread in invasive insects: eco-evolutionary and  
481 management consequences. Biol Invasions. 2016;18(4): 935–952. doi: 10.1007/s10530-016-1082-  
482 9.
- 483 37. Lombaert E, Guillemaud T, Lundgren J, Koch R, Facon B, Grez, A, et al. Complementarity of

484 statistical treatments to reconstruct worldwide routes of invasion: the case of the Asian ladybird  
485 *Harmonia axyridis*. Mol Ecol. 2014;23(24): 5979–5997. doi: 10.1111/mec.12989.  
486 38. Ceryngier P, Twardowska K. *Harmonia axyridis* (Coleoptera: Coccinellidae) as a host of the  
487 parasitic fungus *Hesperomyces virescens* (Ascomycota: Laboulbeniales, Laboulbeniaceae): A case  
488 report and short review. Eur J Entomol. 2013;110(4): 549–557.

489

490 Supporting information captions

491 S1 Table. Localities of *Harmonia axyridis* and its parasites *Hesperomyces virescens* and  
492 *Parasitylenchus bifurcatus* in the Caucasus

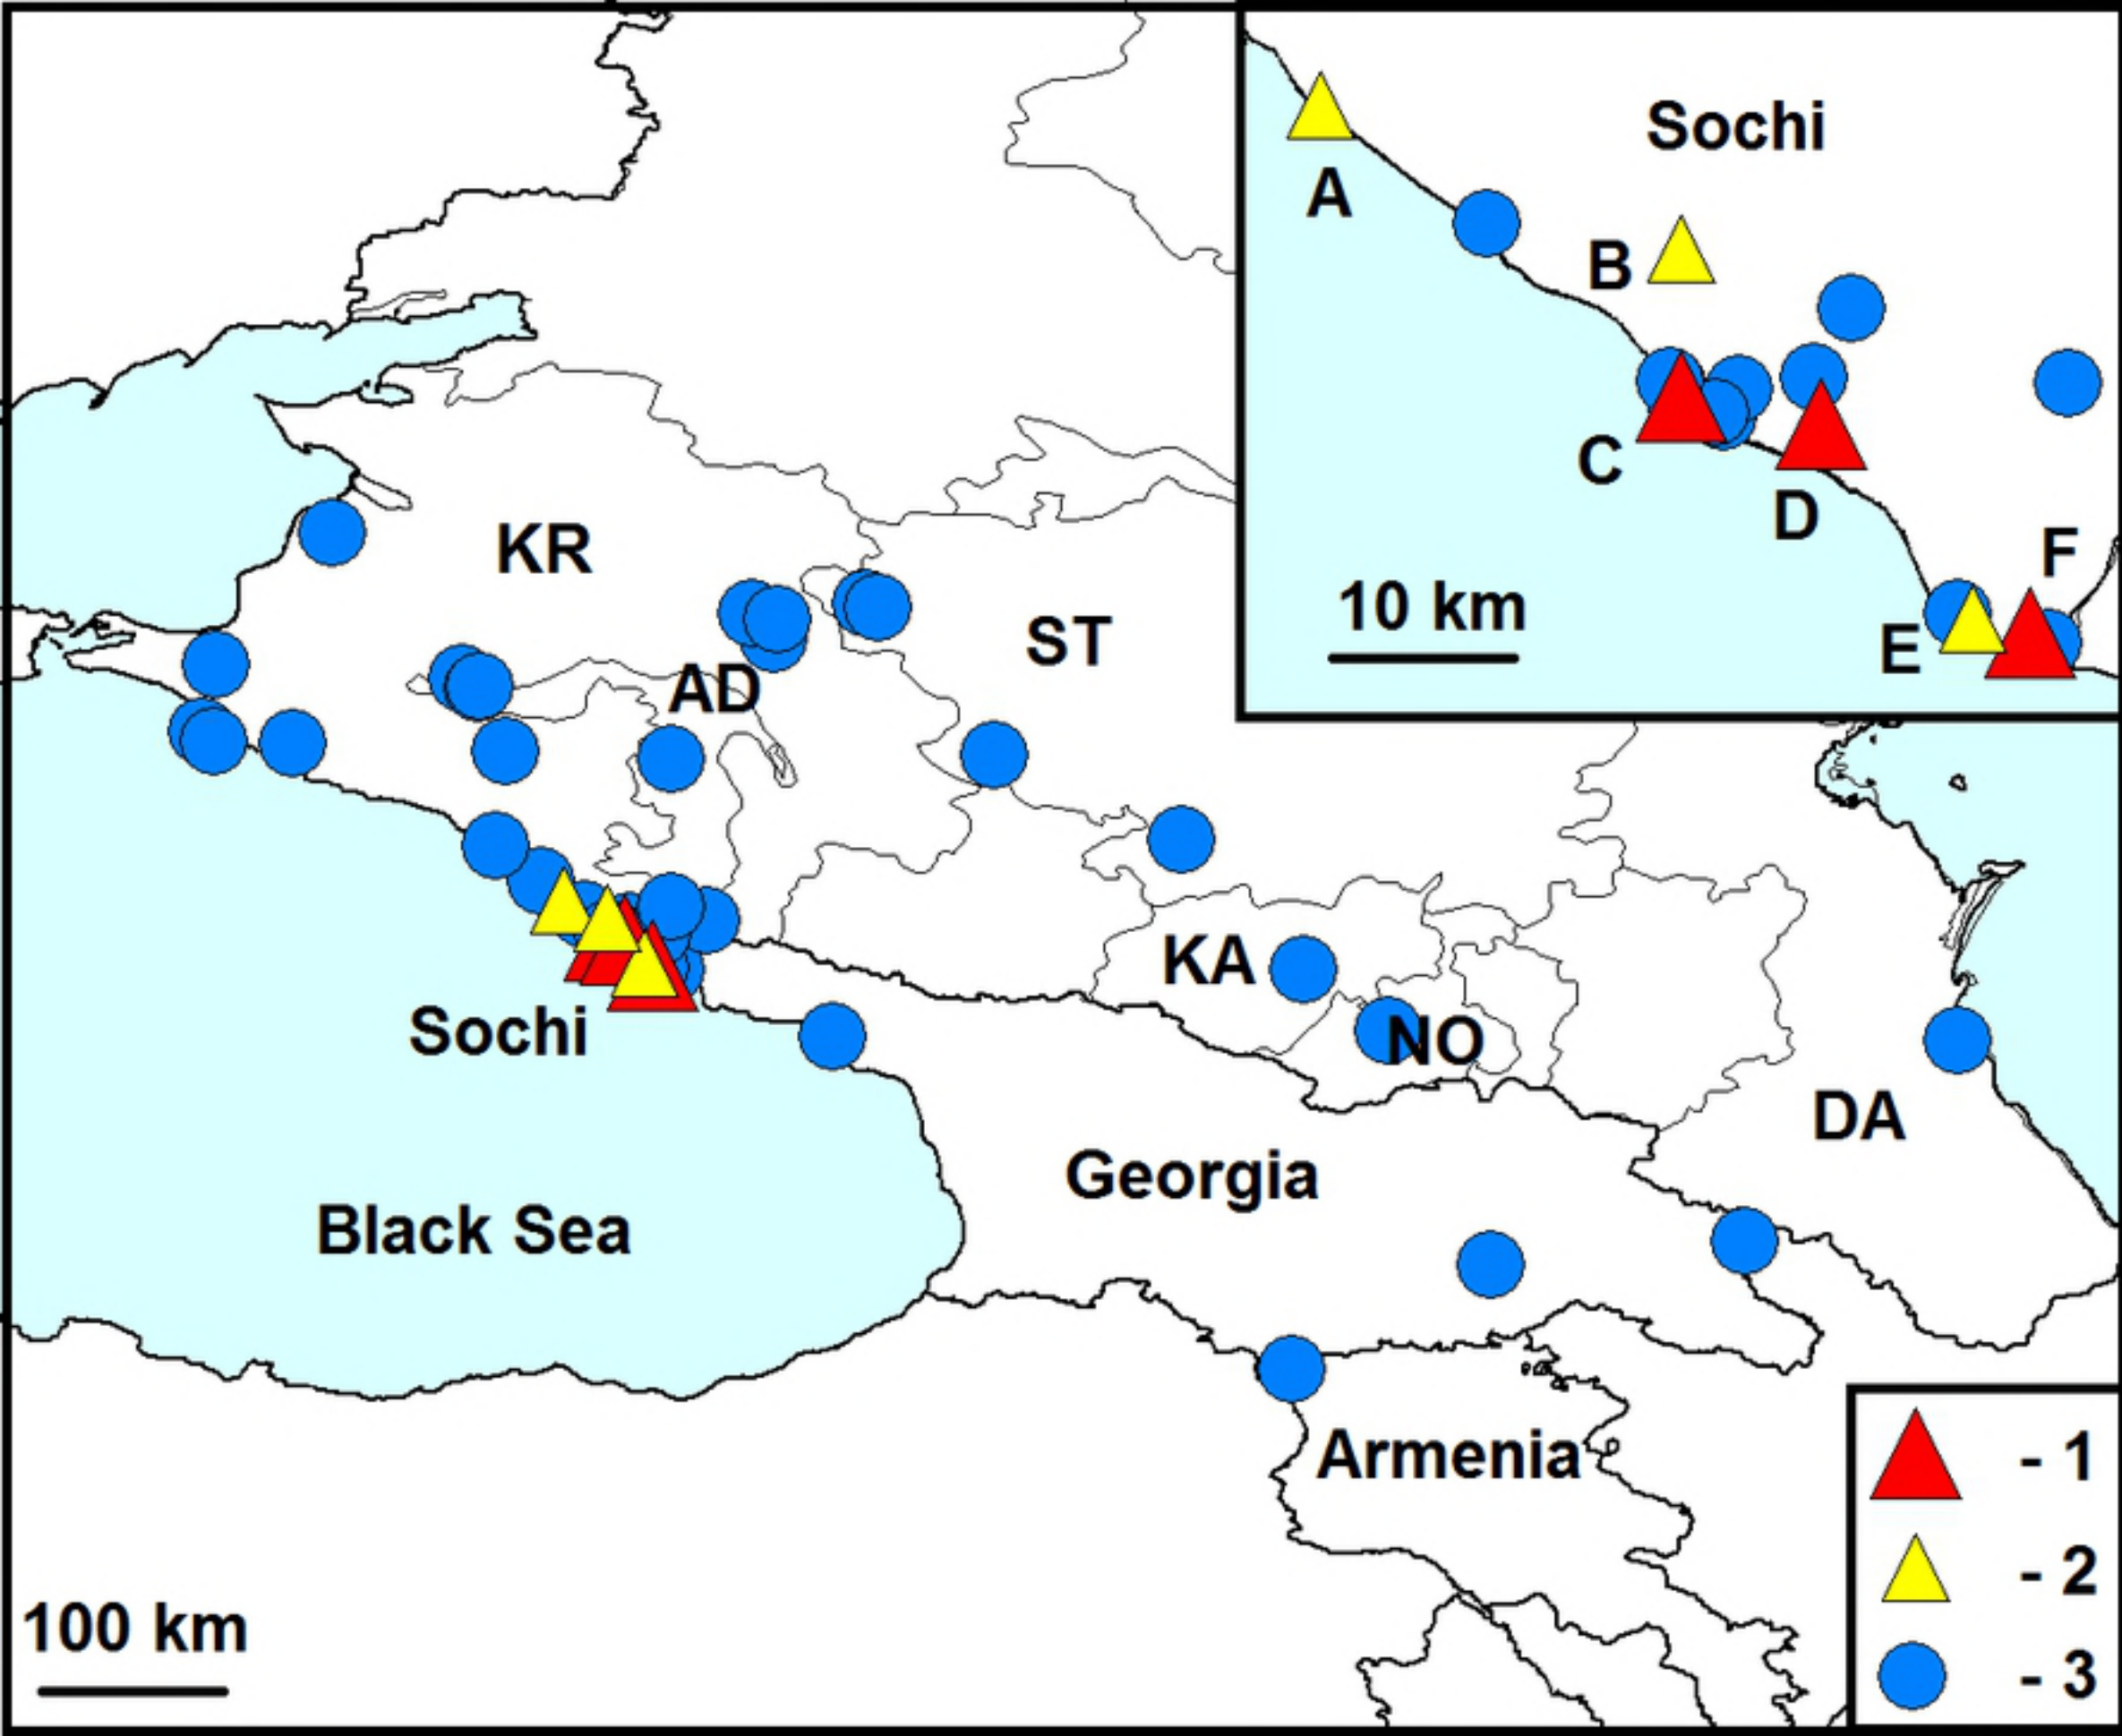

(a)

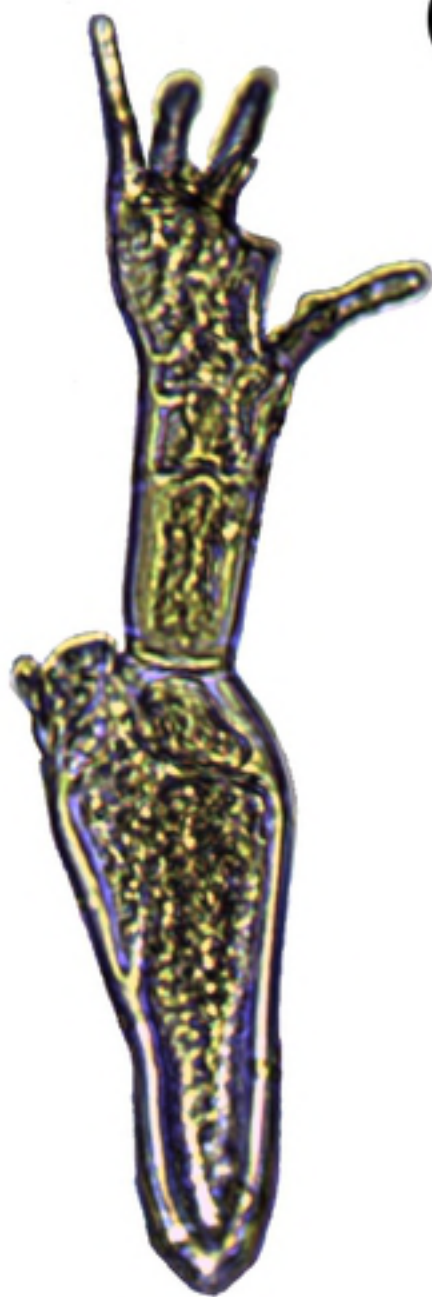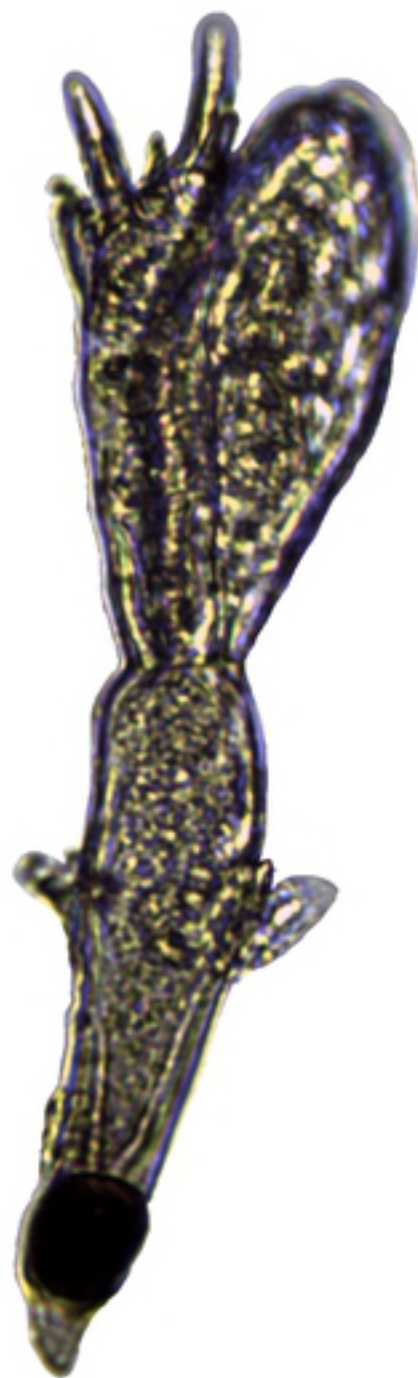

(b)

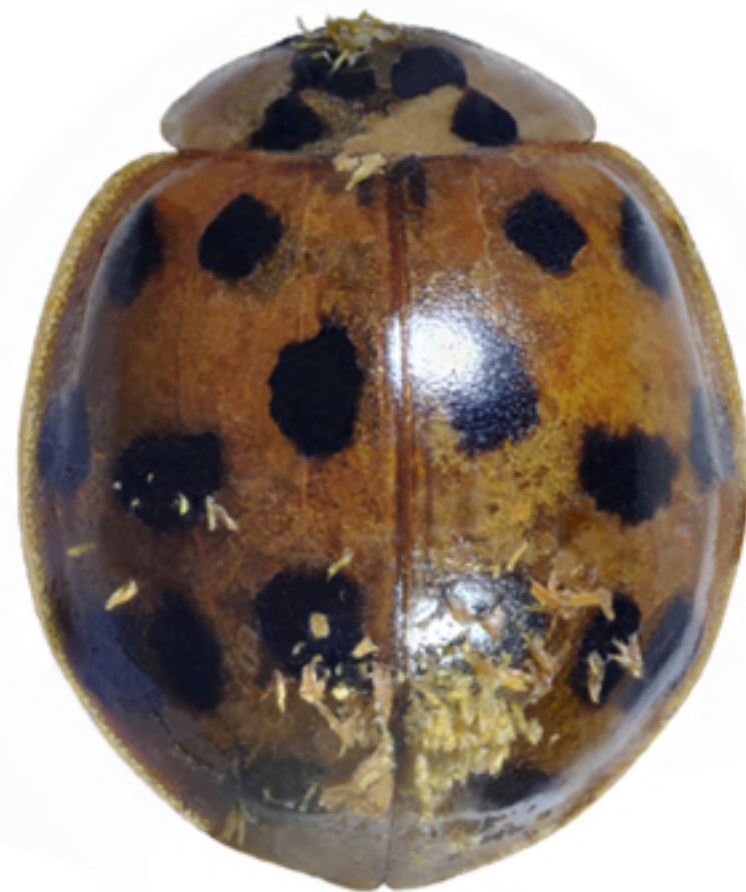



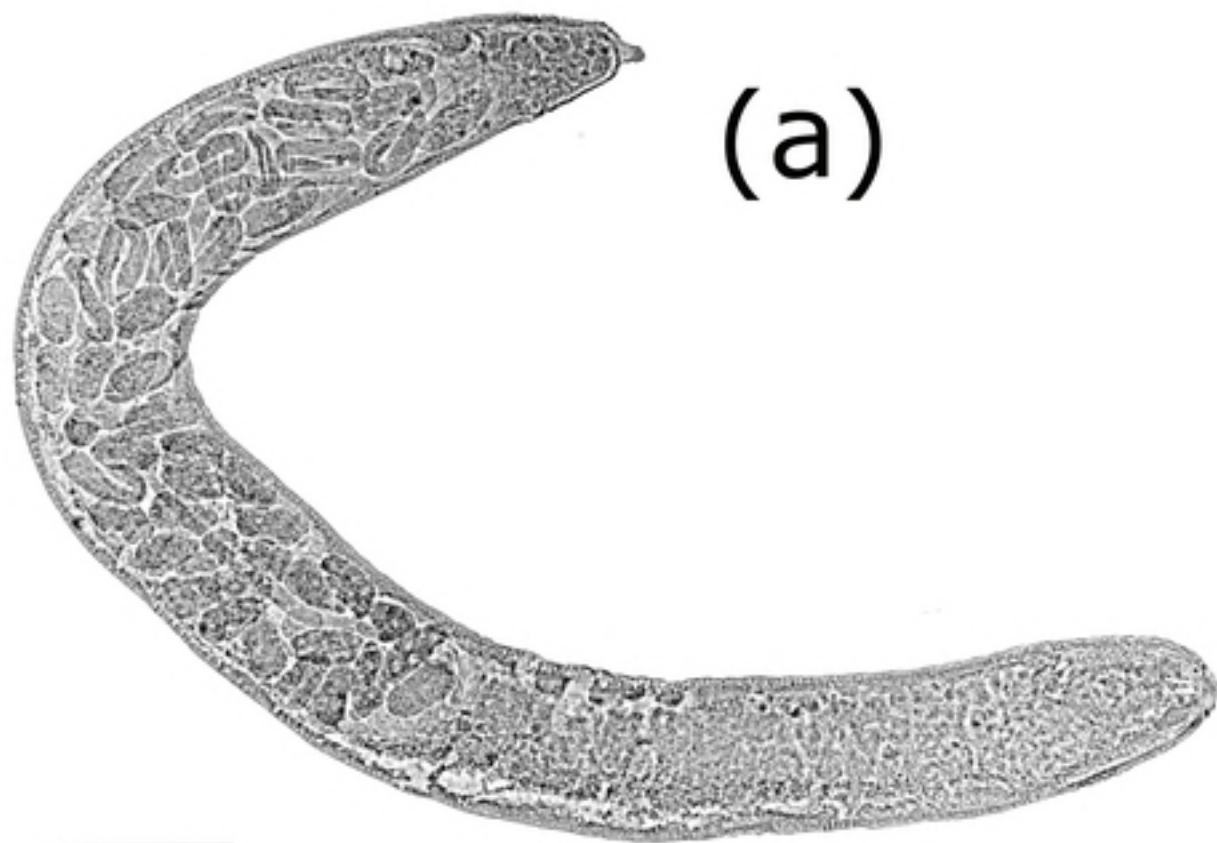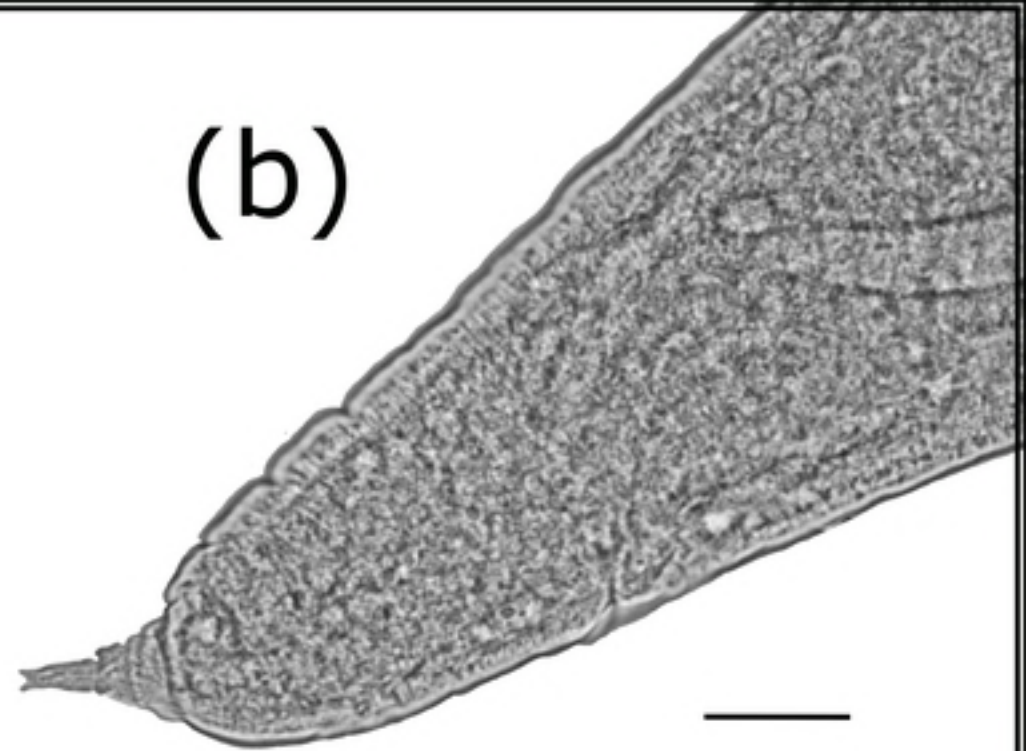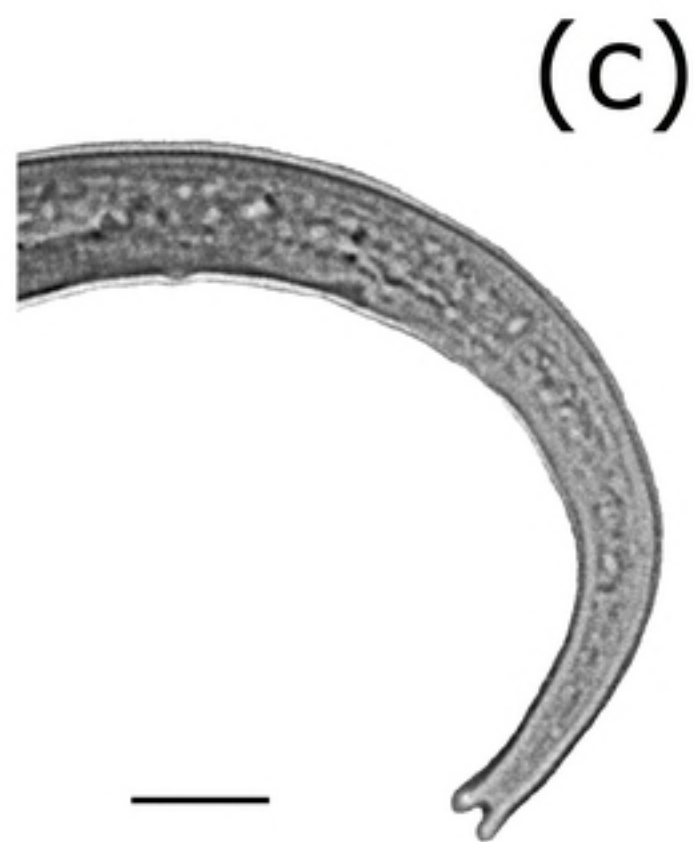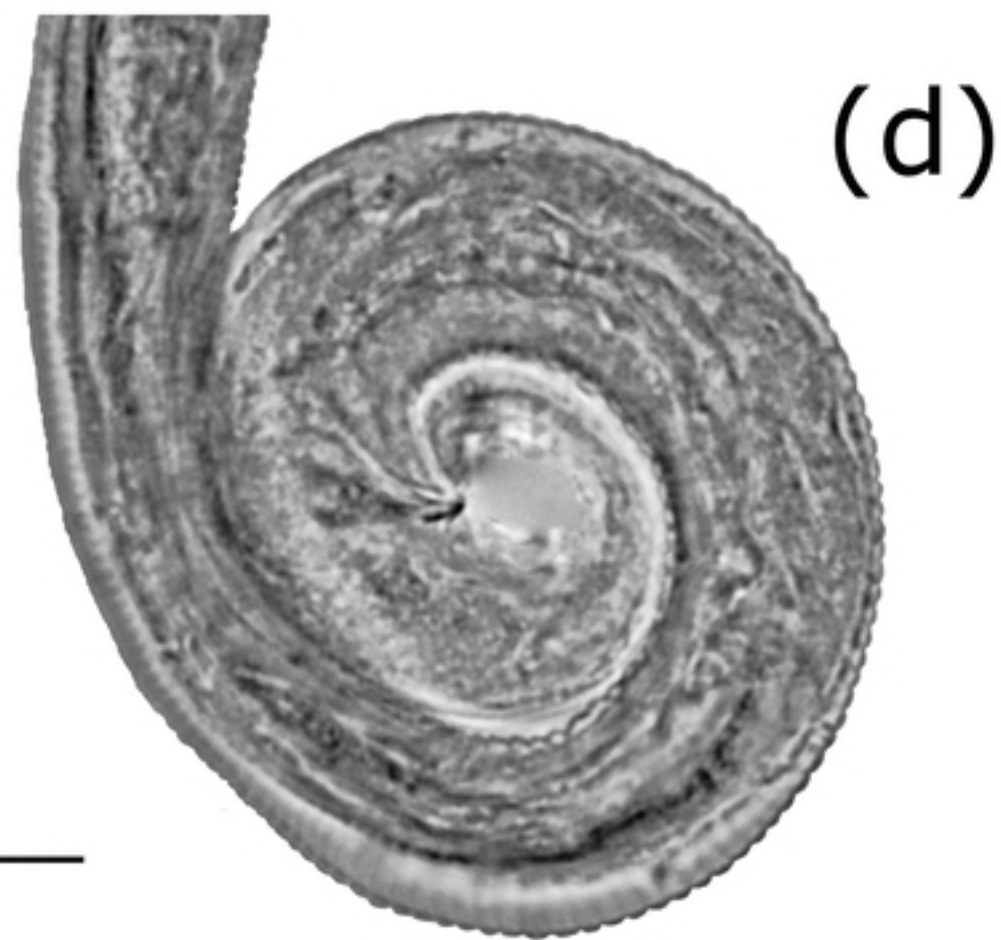

*Howardula* sp. AF519233  
*Hexatylus* sp. KJ636357  
*Deladenus durus* JQ957898  
 Neotylenchidae gen.sp. KY907662  
*Rubzovinema* sp. KF155281  
*Rubzovinema* sp. KF155283  
*Rubzovinema* sp. KF155282  
*Rubzovinema* sp. KY119823  
*Panagrolaimus* sp. KY119850  
*Rubzovinema* sp. KY119814  
*Rubzovinema* sp. KY119847  
*Rubzovinema* sp. KF373731  
*Psyllotylenchus* sp. KF373733  
*Spilotylenchus* sp. KF373735  
*Rubzovinema* sp. KY119815  
*Howardula phyllostretae* JX291137

*Parasitylenchus bifurcatus* LT547722  
*Parasitylenchus bifurcatus* LT547723  
*Parasitylenchus bifurcatus* **Sochi, Russia**  
*Parasitylenchus bifurcatus* KC875398  
 Allantonematidae JQ941710  
*Parasitylenchus bifurcatus* LT547721  
*Parasitylenchus bifurcatus* LT547720  
*Parasitylenchus bifurcatus* LT547719  
*Parasitylenchus bifurcatus* KC875401  
*Parasitylenchus bifurcatus* KC875400  
*Parasitylenchus bifurcatus* KC875397  
*Parasitylenchus bifurcatus* KC875399  
*Parasitylenchus bifurcatus* LT629307  
*Parasitylenchus bifurcatus* LT629306  
*Parasitylenchus bifurcatus* LT547725  
*Parasitylenchus bifurcatus* LT547726

*Deladenus posteroporosus* KY098774  
*Deladenus siricidicola* FJ004889  
 Tylenchomorpha gen.sp. LC147025  
 Tylenchomorpha gen.sp. LC147027  
*Fergusobia* sp. AY589295  
*Howardula* sp. AF519231  
*Howardula neocosmicus* AF519226  
*Howardula aoronymphium* AF519224  
*Howardula aoronymphium* AY589304

bioRxiv preprint doi: <https://doi.org/10.1101/390898>; this version posted August 14, 2019. The copyright holder for this preprint (which was not certified by peer review) is the author/funder, who has granted bioRxiv a license to display the preprint in perpetuity. It is made available under aCC-BY 4.0 International license.

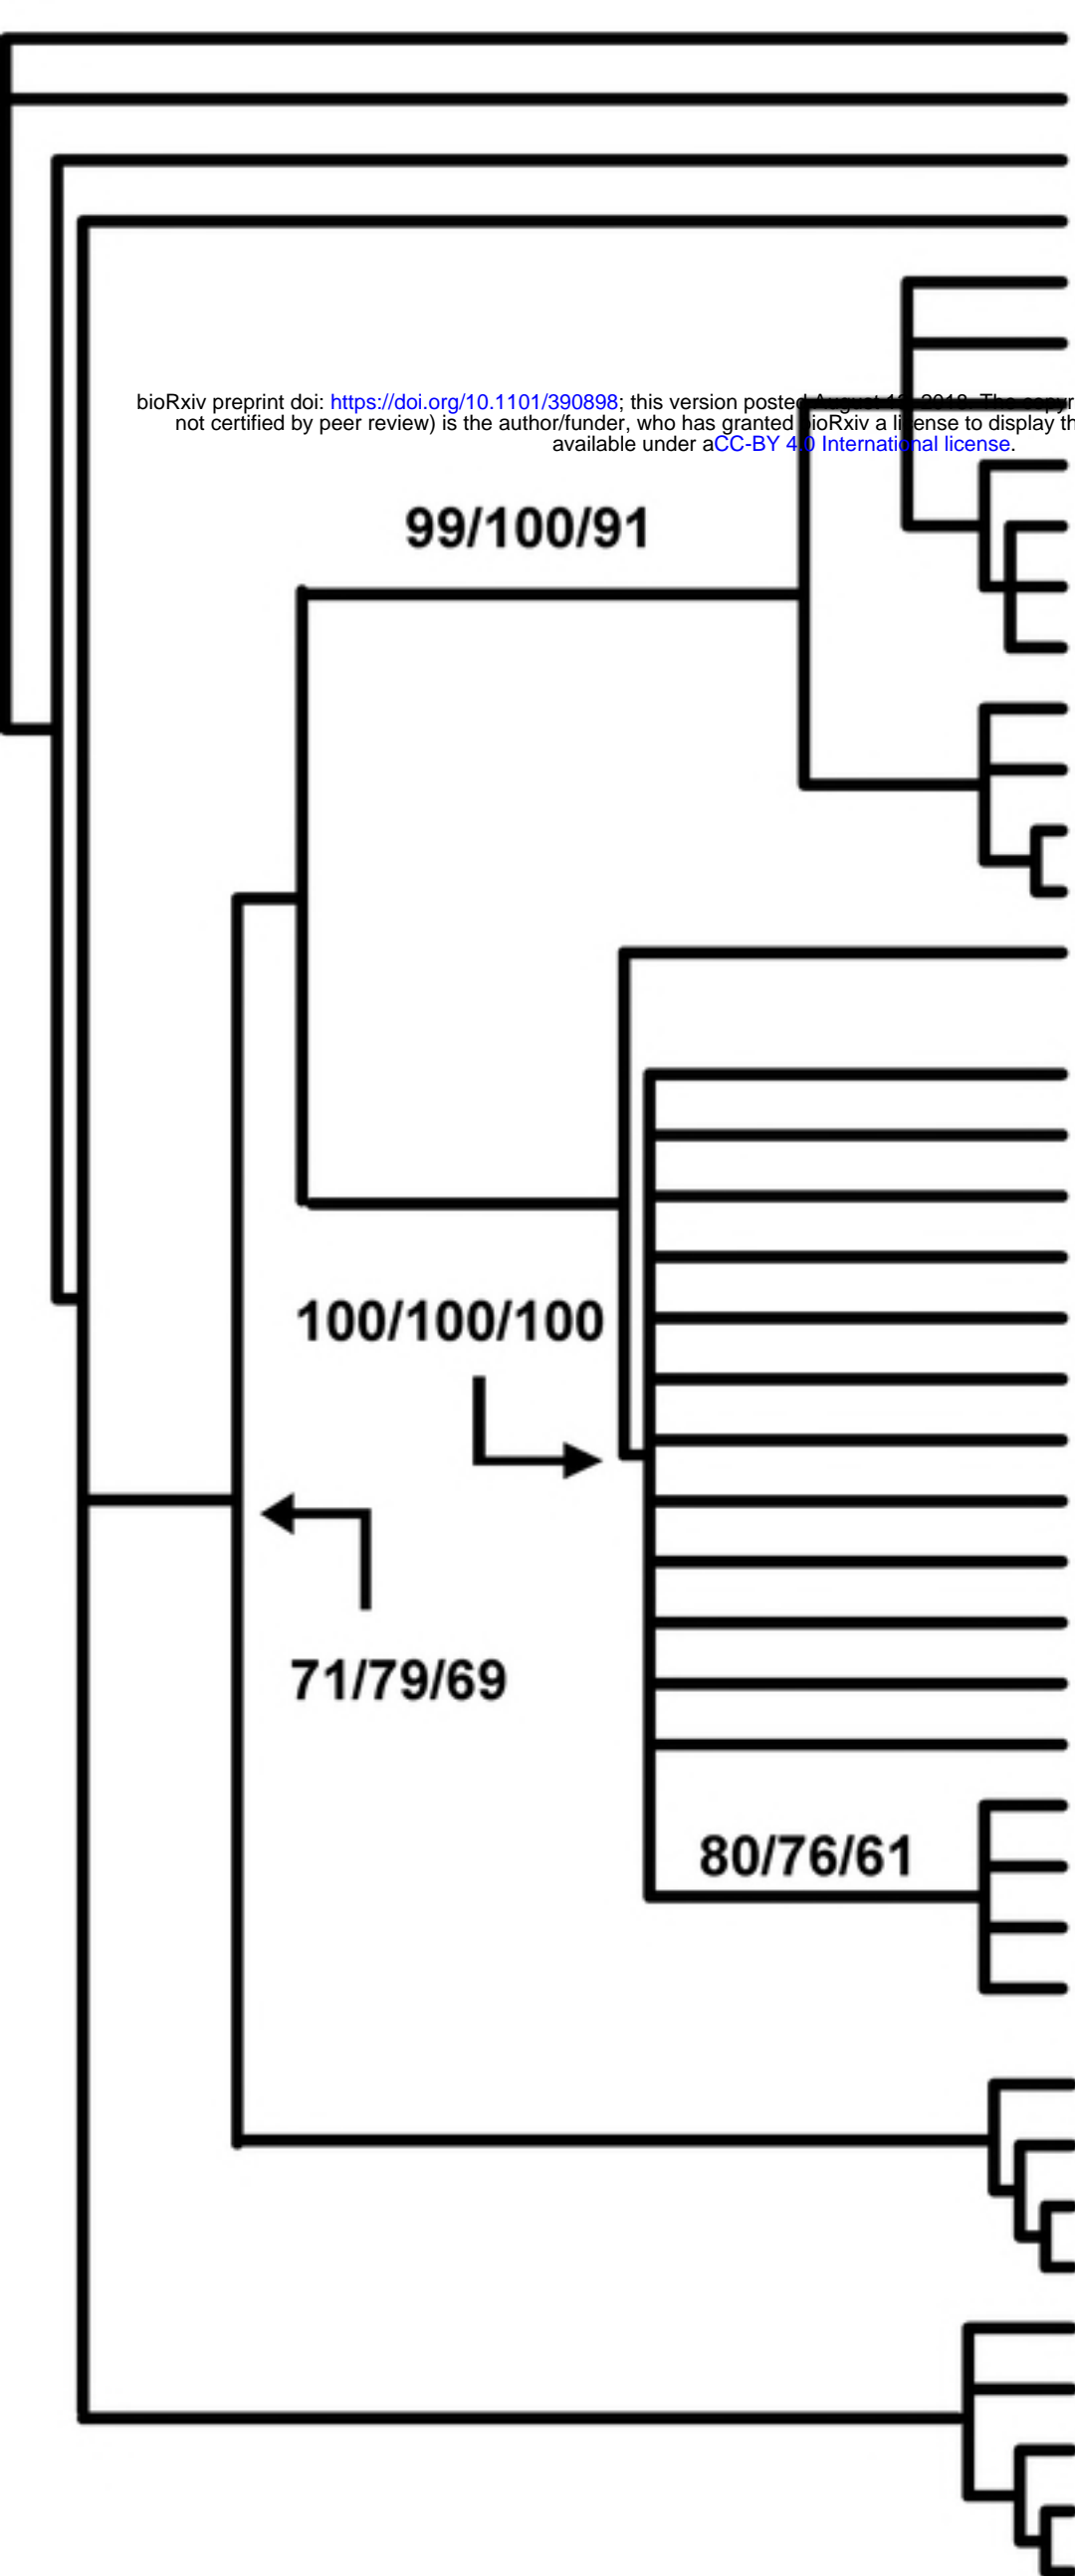

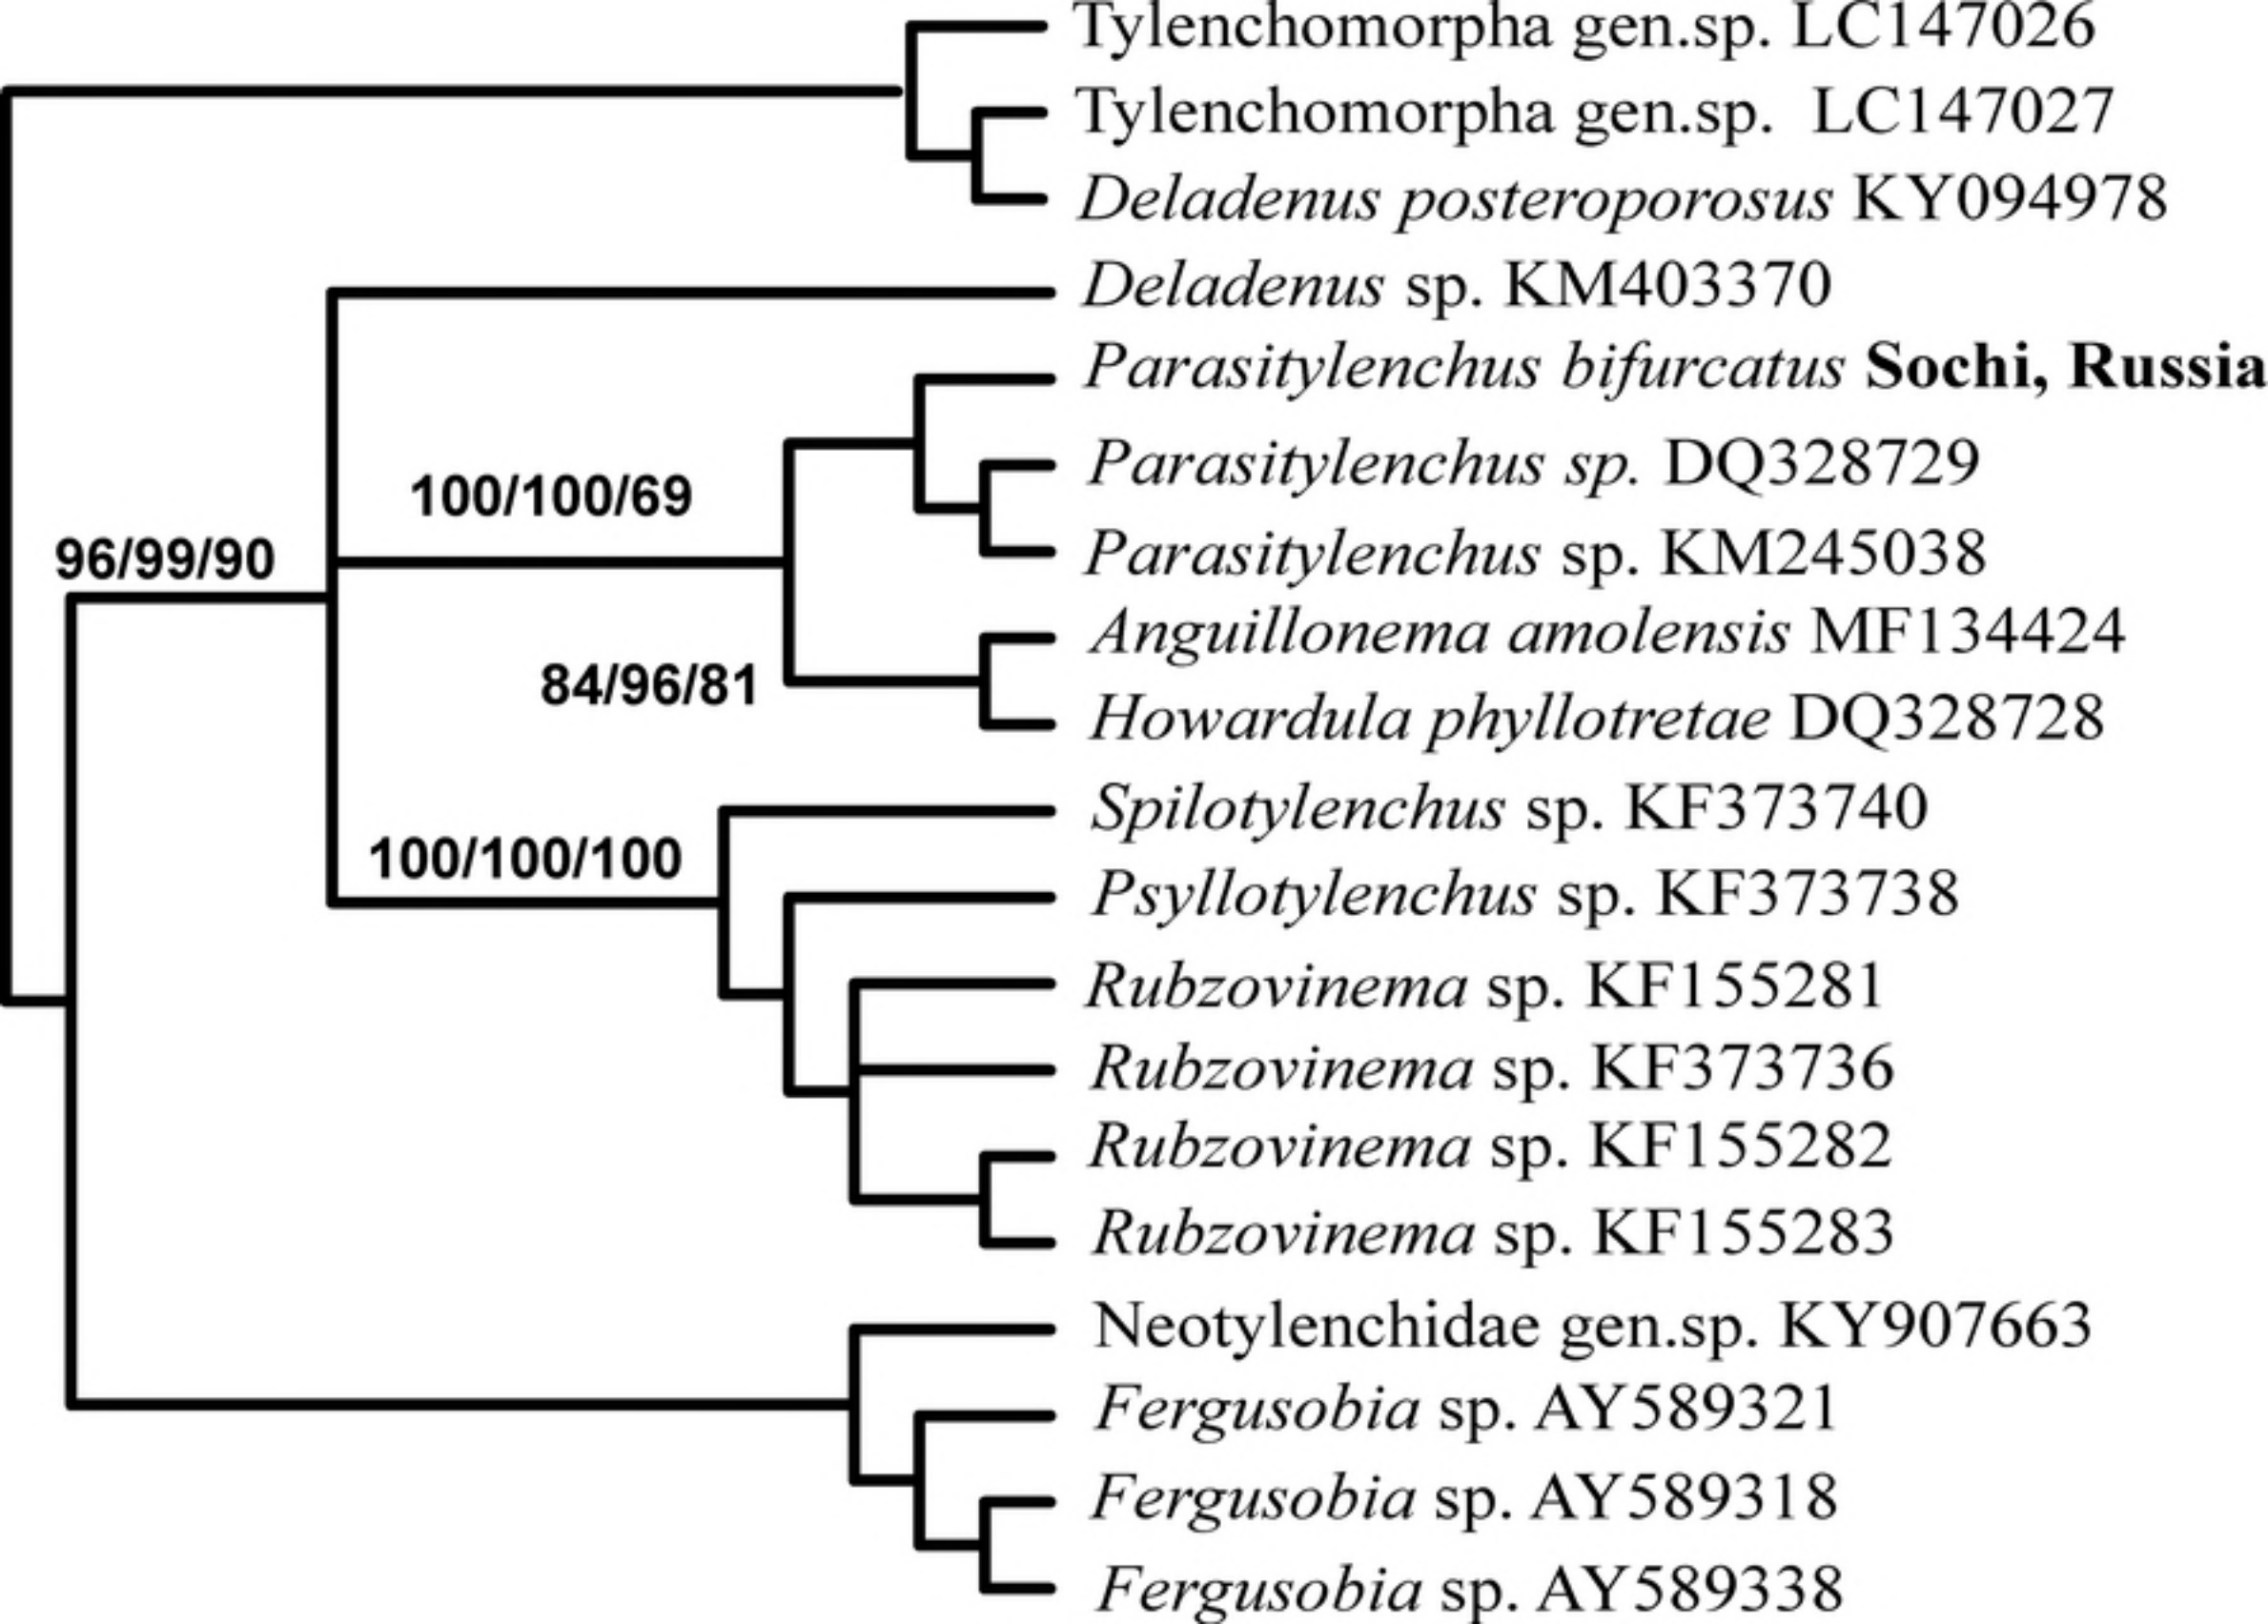

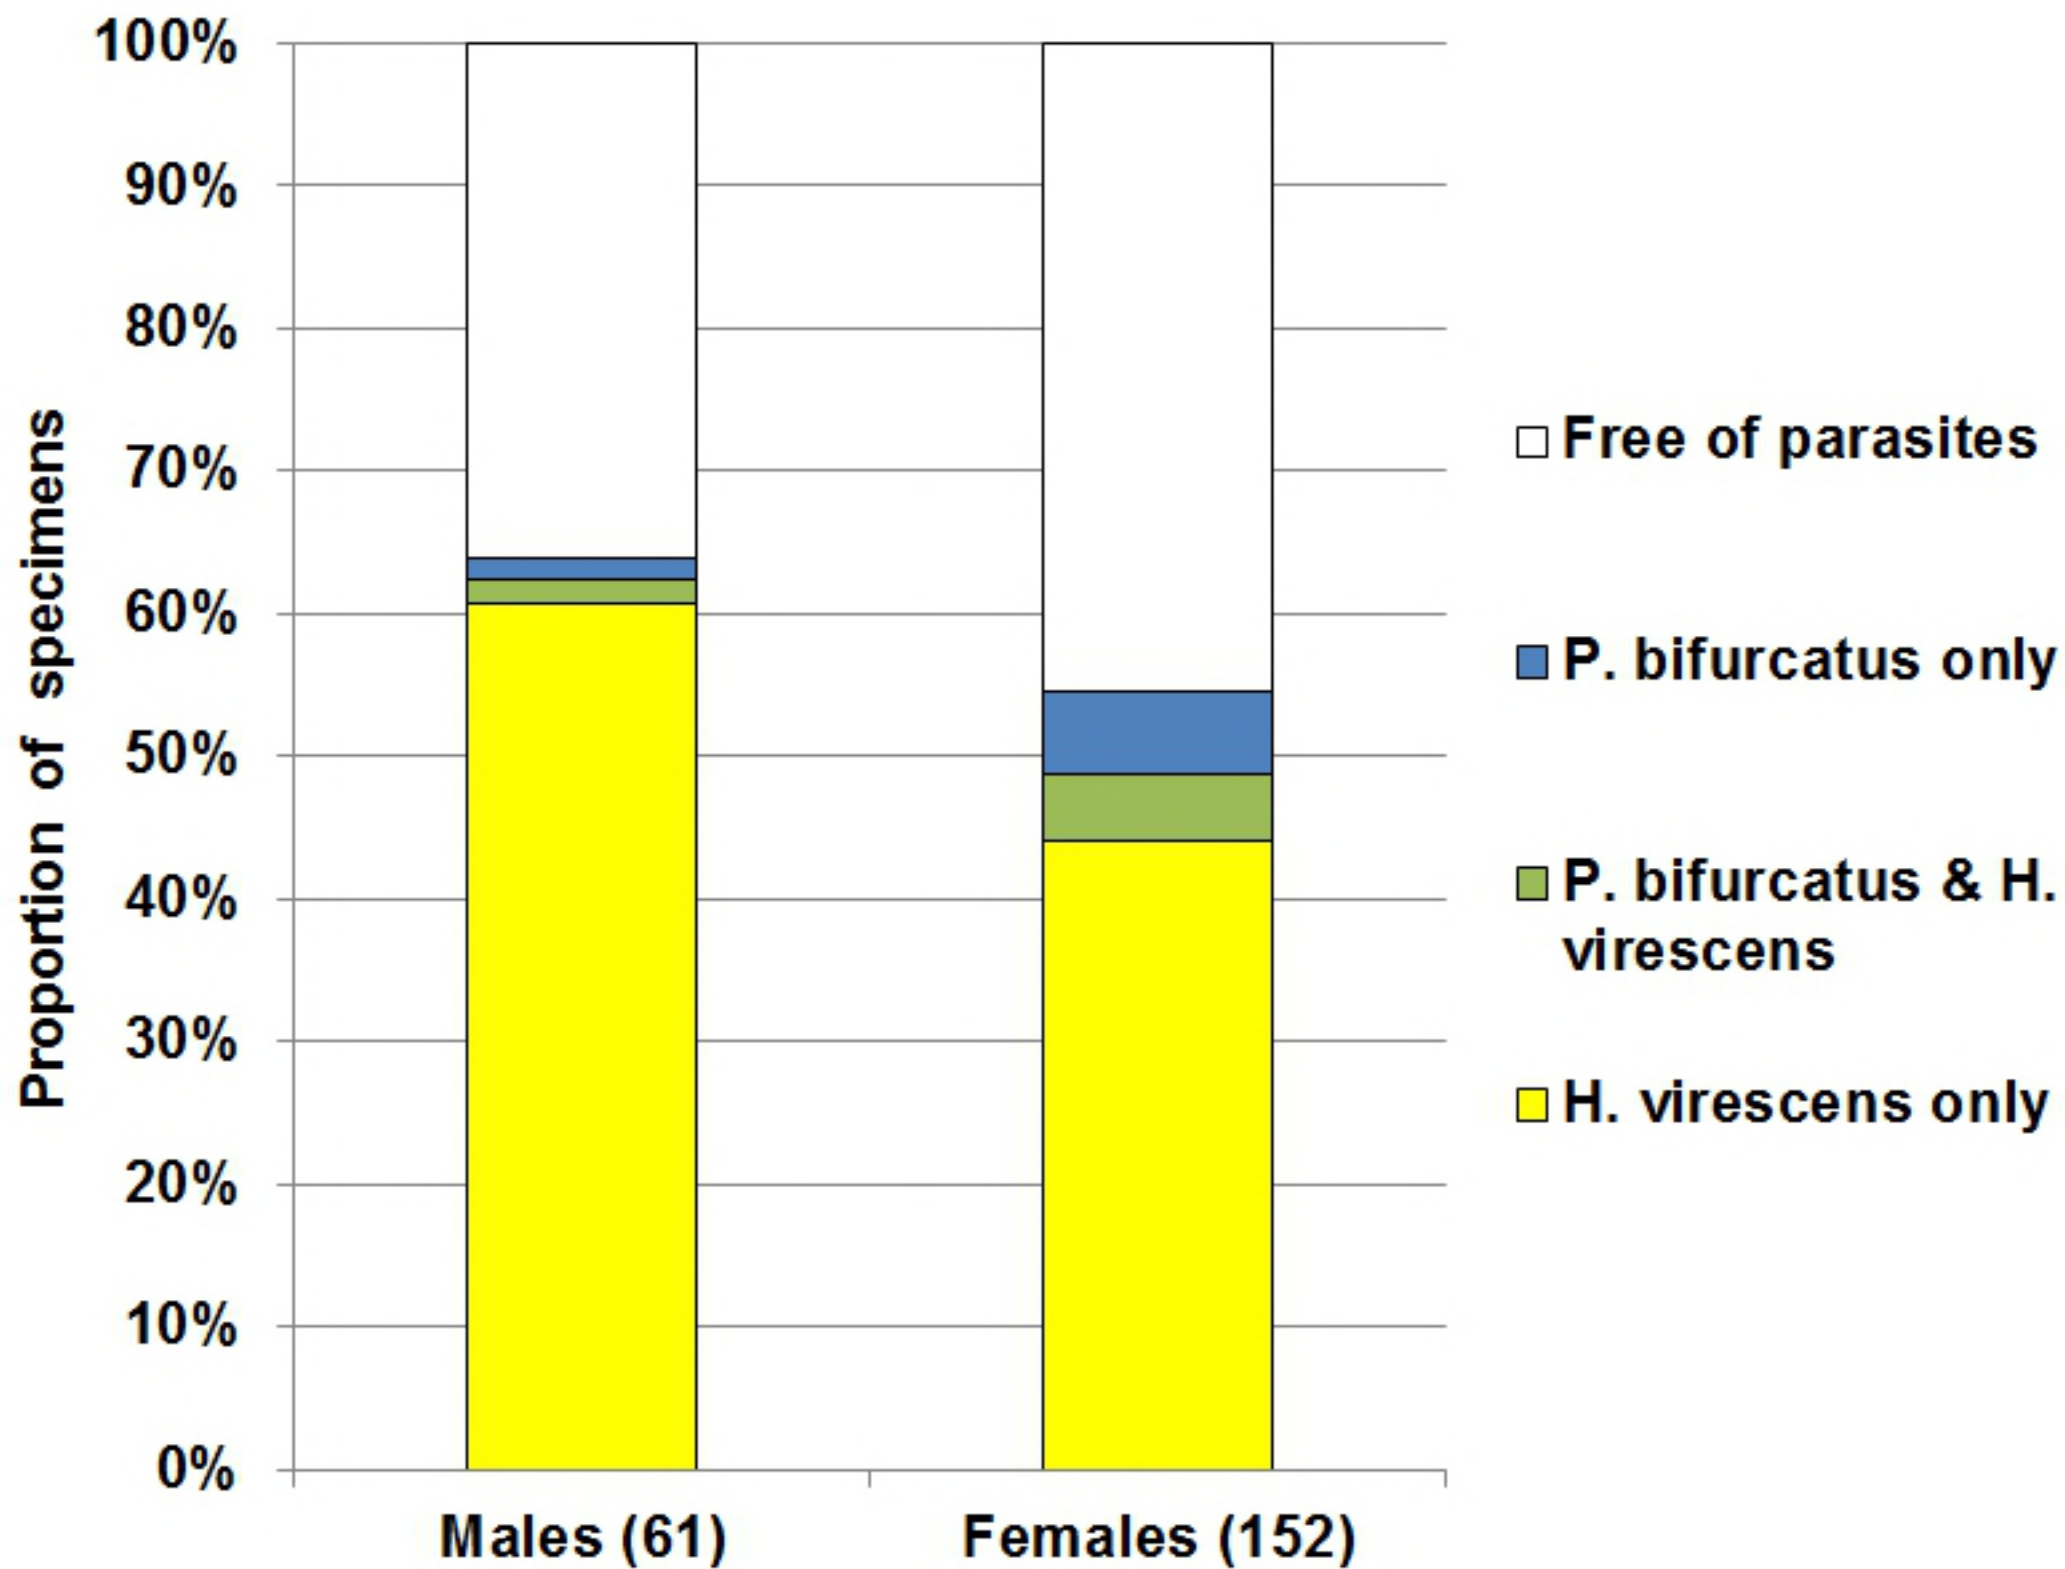

Source: https://www.biorxiv.org/content/10.1101/390898v1.full.pdf
